# Supplementary material for: Deciphering the direct heterometallic interaction in κ3-bis(donor)ferrocenyl-transition-metal complexes
Source: Royal Society of Chemistry journal article supplement (doi:10.1039/d4dt03019b), 2024-12-05
Supplement: d4dt03019b1.pdf [file d4dt03019b1.pdf]

## Electronic Supporting Information

Deciphering the Direct Heterometallic Interaction in  $\kappa^3$ -bis(donor)ferrocenyl-transition-metal  
Complexes

Máté Bartek,<sup>a</sup> Eszter Makkos,<sup>a,b</sup> Zsolt Kelemen\*<sup>a</sup>

<sup>a</sup> Department of Inorganic and Analytical Chemistry, Budapest University of Technology and  
Economics, Műegyetem Rkp. 3, 1111 Budapest, Hungary

<sup>b</sup> HUN-REN Computation Driven Chemistry Research Group, Budapest University of Technology  
and Economics, Műegyetem Rkp. 3, 1111 Budapest, Hungary

**Table S1** Different Fe-M distances reported in the literature

| Name given by the authors                                                                                                                           | Functional | Basis set | M  | $d_{\text{Fe-M}}$<br>[Å] | $d_{\text{Fe-M}}$<br>[Å] | $h_{\text{rel}}$<br>[-] | ref.          |
|-----------------------------------------------------------------------------------------------------------------------------------------------------|------------|-----------|----|--------------------------|--------------------------|-------------------------|---------------|
| [Pd(dppdtbpf)(PPh <sub>3</sub> )] <sup>2+</sup>                                                                                                     | PBE        | TZP-ZORA  | Pd | 2.93                     | 3.20                     | 0.0922                  | <sup>13</sup> |
| [Pd(dppdtbpf)(PPh <sub>3</sub> )] <sup>2+</sup>                                                                                                     | PBE-D3     | TZP-ZORA  | Pd | 2.93                     | 3.20                     | 0.0922                  | <sup>13</sup> |
| [Pd(dcpf)(PPh <sub>3</sub> )] <sup>2+</sup>                                                                                                         | PBE        | TZP-ZORA  | Pd | 2.93                     | 3.17                     | 0.0819                  | <sup>13</sup> |
| [Pd(dcpf)(PPh <sub>3</sub> )] <sup>2+</sup>                                                                                                         | PBE-D3     | TZP-ZORA  | Pd | 2.93                     | 3.17                     | 0.0819                  | <sup>13</sup> |
| [Pt(dppr)(PPh <sub>3</sub> )] <sup>2+</sup>                                                                                                         | PBE        | TZP-ZORA  | Pt | 2.89                     | 3.12                     | 0.0796                  | <sup>13</sup> |
| [Fc'(PPh <sub>2</sub> )(NMe <sub>2</sub> )<br>·Pd(PPh <sub>2</sub> )Fc'(NMe <sub>2</sub> )]<br>[BF <sub>4</sub> ] <sub>2</sub>                      | B3LYP      | def2TZVP  | Pd | 2.82                     | 3.04                     | 0.0793                  | <sup>14</sup> |
| [Pt(dppr)(PPh <sub>3</sub> )] <sup>2+</sup>                                                                                                         | PW91       | TZP-ZORA  | Pt | 2.89                     | 3.11                     | 0.0761                  | <sup>13</sup> |
| [Fc'(PPh <sub>2</sub> )(NMe <sub>2</sub> )<br>·Pd(PPh <sub>2</sub> )Fc'(NMe <sub>2</sub> )]<br>[BF <sub>4</sub> ] <sub>2</sub>                      | BP86       | def2TZVP  | Pd | 2.82                     | 3.02                     | 0.0715                  | <sup>14</sup> |
| [Fc'(PMes <sub>2</sub> )(PrBu <sub>2</sub> )<br>·PdCl][SbF <sub>6</sub> ]                                                                           | B3LYP-D3   | def2TZVP  | Pd | 2.84                     | 3.03                     | 0.0691                  | <sup>14</sup> |
| [Fc'(PMes <sub>2</sub> )(PrBu <sub>2</sub> )<br>·PdCl][SbF <sub>6</sub> ]                                                                           | M06-2X     | def2TZVP  | Pd | 2.84                     | 3.03                     | 0.0673                  | <sup>14</sup> |
| [Pd(dppr)(PPh <sub>3</sub> )] <sup>2+</sup>                                                                                                         | PBE        | TZP-ZORA  | Pd | 2.89                     | 3.08                     | 0.0657                  | <sup>13</sup> |
| [Pd(dppr)(PPh <sub>3</sub> )] <sup>2+</sup>                                                                                                         | PBE-D3     | TZP-ZORA  | Pd | 2.89                     | 3.08                     | 0.0657                  | <sup>13</sup> |
| [Fc'(PPh <sub>2</sub> )(NMe <sub>2</sub> )<br>·PdP( <i>p</i> -OMe-<br>C <sub>6</sub> H <sub>4</sub> ) <sub>3</sub> ][BF <sub>4</sub> ] <sub>2</sub> | B3LYP      | def2TZVP  | Pd | 2.83                     | 3.02                     | 0.0656                  | <sup>14</sup> |
| [Fc'(PPh <sub>2</sub> )(NMe <sub>2</sub> )<br>·Pd(PPh <sub>2</sub> )Fc'(NMe <sub>2</sub> )]<br>[BF <sub>4</sub> ] <sub>2</sub>                      | B3LYP-D3   | def2TZVP  | Pd | 2.82                     | 3.00                     | 0.0651                  | <sup>14</sup> |
| [Fc'(PPh <sub>2</sub> )(NMe <sub>2</sub> )<br>·Pd(PPh <sub>2</sub> C <sub>5</sub> H <sub>5</sub> )]<br>[SbF <sub>6</sub> ] <sub>2</sub>             | B3LYP      | def2TZVP  | Pd | 2.81                     | 2.99                     | 0.0647                  | <sup>14</sup> |
| [Fc'(PPh <sub>2</sub> )(NMe <sub>2</sub> )<br>·Pd(PPh <sub>2</sub> )Fc'(NMe <sub>2</sub> )]<br>[BF <sub>4</sub> ] <sub>2</sub>                      | M06-2X     | def2TZVP  | Pd | 2.82                     | 3.00                     | 0.0637                  | <sup>14</sup> |
| [Fc'(PPh <sub>2</sub> )(NMe <sub>2</sub> )<br>·PdCl][SbF <sub>6</sub> ] <sub>2</sub>                                                                | M06-2X     | def2TZVP  | Pd | 2.74                     | 2.91                     | 0.0630                  | <sup>14</sup> |
| [Fc'(PPh <sub>2</sub> )(NMe <sub>2</sub> )<br>·PdP( <i>p</i> -OMe-<br>C <sub>6</sub> H <sub>4</sub> ) <sub>3</sub> ][BF <sub>4</sub> ] <sub>2</sub> | M06-2X     | def2TZVP  | Pd | 2.83                     | 3.01                     | 0.0618                  | <sup>14</sup> |
| [Pd(dcpf)(PPh <sub>3</sub> )] <sup>2+</sup>                                                                                                         | PW91       | TZP-ZORA  | Pd | 2.93                     | 3.11                     | 0.0614                  | <sup>13</sup> |
| [Fc'(PPh <sub>2</sub> )(NMe <sub>2</sub> )<br>·Pd(PPh <sub>2</sub> )Fc'(NMe <sub>2</sub> )]<br>[BF <sub>4</sub> ] <sub>2</sub>                      | B3LYP      | def2TZVP  | Pd | 2.83                     | 3.00                     | 0.0605                  | <sup>14</sup> |
| [Fc'(PPh <sub>2</sub> )(NMe <sub>2</sub> )<br>·PdCl][SbF <sub>6</sub> ] <sub>2</sub>                                                                | B3LYP-D3   | def2TZVP  | Pd | 2.74                     | 2.90                     | 0.0590                  | <sup>14</sup> |
| [Fc'(PPh <sub>2</sub> )(NMe <sub>2</sub> )<br>·PdP( <i>p</i> -OMe-C <sub>6</sub> H <sub>4</sub> ) <sub>3</sub> ]<br>[BF <sub>4</sub> ] <sub>2</sub> | B3LYP-D3   | def2TZVP  | Pd | 2.83                     | 3.00                     | 0.0589                  | <sup>14</sup> |
| [Pd(dppr)(PPh <sub>3</sub> )] <sup>2+</sup>                                                                                                         | PW91       | TZP-ZORA  | Pd | 2.89                     | 3.06                     | 0.0588                  | <sup>13</sup> |

|                                                                                                                                                     |                                |                          |    |      |      |        |    |
|-----------------------------------------------------------------------------------------------------------------------------------------------------|--------------------------------|--------------------------|----|------|------|--------|----|
| [Pt(dppr)(PPh <sub>3</sub> )] <sup>2+</sup>                                                                                                         | PBE-D3                         | TZP-ZORA                 | Pt | 2.89 | 3.06 | 0.0588 | 13 |
| [Fc'(PPh <sub>2</sub> )(NMe <sub>2</sub> )<br>·PdP( <i>p</i> -OMe-<br>C <sub>6</sub> H <sub>4</sub> ) <sub>3</sub> ][BF <sub>4</sub> ] <sub>2</sub> | BP86                           | def2TZVP                 | Pd | 2.83 | 3.00 | 0.0582 | 14 |
| [Pd(dppdtbpf)(PPh <sub>3</sub> )] <sup>2+</sup>                                                                                                     | PW91                           | TZP-ZORA                 | Pd | 2.93 | 3.10 | 0.0580 | 13 |
| [Fc'(PPh <sub>2</sub> )(NMe <sub>2</sub> )<br>·Pd(PPh <sub>2</sub> C <sub>5</sub> H <sub>5</sub> )] [SbF <sub>6</sub> ] <sub>2</sub>                | M06-2X                         | def2TZVP                 | Pd | 2.81 | 2.97 | 0.0580 | 14 |
| [Fc'(PMes <sub>2</sub> )( <i>Pr</i> Bu <sub>2</sub> )<br>·PdCl][SbF <sub>6</sub> ]                                                                  | B3LYP                          | def2TZVP                 | Pd | 2.84 | 3.00 | 0.0568 | 14 |
| [Fc'(PPh <sub>2</sub> )(NMe <sub>2</sub> )<br>·Pd(PPh <sub>2</sub> C <sub>5</sub> H <sub>5</sub> )] [SbF <sub>6</sub> ] <sub>2</sub>                | BP86                           | def2TZVP                 | Pd | 2.81 | 2.97 | 0.0559 | 14 |
| [Fc'(PPh <sub>2</sub> )(NMe <sub>2</sub> )<br>·Pd(PPh <sub>2</sub> )Fc'(NMe <sub>2</sub> )]<br>[BF <sub>4</sub> ] <sub>2</sub>                      | M06-2X                         | def2TZVP                 | Pd | 2.83 | 2.99 | 0.0552 | 14 |
| [Fc'(PPh <sub>2</sub> )(NMe <sub>2</sub> )<br>·Pd(PPh <sub>2</sub> C <sub>5</sub> H <sub>5</sub> )] [SbF <sub>6</sub> ] <sub>2</sub>                | B3LYP-D3                       | def2TZVP                 | Pd | 2.81 | 2.97 | 0.0548 | 14 |
| [Fc'(PPh <sub>2</sub> )(NMe <sub>2</sub> )<br>·Pd(PPh <sub>2</sub> )Fc'(NMe <sub>2</sub> )]<br>[BF <sub>4</sub> ] <sub>2</sub>                      | B3LYP-D3                       | def2TZVP                 | Pd | 2.83 | 2.98 | 0.0527 | 14 |
| [Fc'(PPh <sub>2</sub> )(NMe <sub>2</sub> )<br>·Pd(PPh <sub>2</sub> )Fc'(NMe <sub>2</sub> )]<br>[BF <sub>4</sub> ] <sub>2</sub>                      | PBEh1PBE                       | def2TZVP                 | Pd | 2.82 | 2.97 | 0.0520 | 14 |
| [Pd(dtbpf)Cl] <sup>+</sup>                                                                                                                          | PBE-D3                         | TZP-ZORA                 | Pd | 2.94 | 3.09 | 0.0510 | 13 |
| [Pt(dcpf)(PPh <sub>3</sub> )] <sup>2+</sup>                                                                                                         | PW91                           | TZP-ZORA                 | Pt | 2.94 | 3.09 | 0.0510 | 13 |
| [Pt(dcpf)(PPh <sub>3</sub> )] <sup>2+</sup>                                                                                                         | PBE                            | TZP-ZORA                 | Pt | 2.94 | 3.09 | 0.0510 | 13 |
| [Pd(dcpf)(PMe <sub>3</sub> )] <sup>2+</sup>                                                                                                         | PBE-D3                         | TZP-ZORA                 | Pd | 2.95 | 3.10 | 0.0508 | 13 |
| [Pd(dcpf)(PMe <sub>3</sub> )] <sup>2+</sup>                                                                                                         | PW91                           | TZP-ZORA                 | Pd | 2.95 | 3.10 | 0.0508 | 13 |
| [Fc'(PPh <sub>2</sub> )(NMe <sub>2</sub> )<br>·Pd(PPh <sub>2</sub> )Fc'(NMe <sub>2</sub> )]<br>[BF <sub>4</sub> ] <sub>2</sub>                      | BP86                           | def2TZVP                 | Pd | 2.83 | 2.97 | 0.0506 | 14 |
| [Pd(dtbpf)Cl] <sup>+</sup>                                                                                                                          | PBE                            | TZP-ZORA                 | Pd | 2.94 | 3.08 | 0.0476 | 13 |
| [Fc'(PMes <sub>2</sub> )( <i>Pr</i> Bu <sub>2</sub> )<br>·PdCl][SbF <sub>6</sub> ]                                                                  | B3LYP                          | def2TZVP                 | Pd | 2.74 | 2.86 | 0.0455 | 14 |
| [Pt(dcpf)(PPh <sub>3</sub> )] <sup>2+</sup>                                                                                                         | PBE-D3                         | TZP-ZORA                 | Pt | 2.94 | 3.07 | 0.0442 | 13 |
| [Pd(dcpf)(PMe <sub>3</sub> )] <sup>2+</sup>                                                                                                         | PBE-D3                         | TZP-ZORA                 | Pd | 2.95 | 3.08 | 0.0441 | 13 |
| Pd(dppf<br>κ <sup>3</sup> P,P',Fe)(PPh <sub>3</sub> )] [BF <sub>4</sub> ] <sub>2</sub>                                                              | M11/LAN<br>L2DZ-ECP<br>(Fe,Pd) | 6-31 <sup>+</sup> G(d,p) | Pd | 2.76 | 2.88 | 0.0438 | 35 |
| [Pd(dppf)(PPh <sub>3</sub> )] <sup>2+</sup>                                                                                                         | PBE-D3                         | TZP-ZORA                 | Pd | 2.89 | 3.01 | 0.0415 | 13 |
| [Pd(dppf)(PPh <sub>3</sub> )] <sup>2+</sup>                                                                                                         | PBE-D3                         | TZP-ZORA                 | Pd | 2.89 | 3.01 | 0.0415 | 13 |
| [Fc'(PMes <sub>2</sub> )( <i>Pr</i> Bu <sub>2</sub> )<br>·PdCl][SbF <sub>6</sub> ]                                                                  | BP86                           | def2TZVP                 | Pd | 2.84 | 2.95 | 0.0402 | 14 |
| [Fc'(PMes <sub>2</sub> )( <i>Pr</i> Bu <sub>2</sub> )<br>·PdCl][SbF <sub>6</sub> ]                                                                  | ωB97X-D                        | def2TZVP                 | Pd | 2.84 | 2.95 | 0.0381 | 14 |
| [Pd(dppf)(PPh <sub>3</sub> )] <sup>2+</sup>                                                                                                         | PBE                            | TZP-ZORA                 | Pd | 2.89 | 3.00 | 0.0381 | 13 |
| [Pd(dtbpf)I] <sup>+</sup>                                                                                                                           | PBE-D3                         | TZP-ZORA                 | Pd | 2.92 | 3.03 | 0.0377 | 13 |

|                                                                                                                                                     |          |           |    |      |      |        |    |
|-----------------------------------------------------------------------------------------------------------------------------------------------------|----------|-----------|----|------|------|--------|----|
| [Fc'(PPh <sub>2</sub> )(NMe <sub>2</sub> )<br>·PdP( <i>p</i> -OMe-<br>C <sub>6</sub> H <sub>4</sub> ) <sub>3</sub> ][BF <sub>4</sub> ] <sub>2</sub> | PBEh1PBE | def2TZVP  | Pd | 2.83 | 2.94 | 0.0371 | 14 |
| [Fc'(PPh <sub>2</sub> )(NMe <sub>2</sub> )<br>·Pd(PPh <sub>2</sub> C <sub>5</sub> H <sub>5</sub> )] [SbF <sub>6</sub> ] <sub>2</sub>                | PBEh1PBE | def2TZVP  | Pd | 2.81 | 2.92 | 0.0370 | 14 |
| [Pd(dtbpf)I] <sup>+</sup>                                                                                                                           | PBE      | TZP-ZORA  | Pd | 2.92 | 3.02 | 0.0342 | 13 |
| [Fc'(PPh <sub>2</sub> )(NMe <sub>2</sub> )<br>·PdCl][SbF <sub>6</sub> ] <sub>2</sub>                                                                | ωB97X-D  | def2TZVP  | Pd | 2.74 | 2.83 | 0.0342 | 14 |
| [Fc'(PMes <sub>2</sub> )(PtBu <sub>2</sub> )<br>·PdCl][SbF <sub>6</sub> ]                                                                           | PBEh1PBE | def2TZVP  | Pd | 2.84 | 2.93 | 0.0335 | 14 |
| [Fc'(PPh <sub>2</sub> )(NMe <sub>2</sub> )<br>·Pd(PPh <sub>2</sub> )Fc'(NMe <sub>2</sub> )]<br>[BF <sub>4</sub> ] <sub>2</sub>                      | PBEh1PBE | def2TZVP  | Pd | 2.83 | 2.92 | 0.0326 | 14 |
| [Fc(NCNDIPP) <sub>2</sub> Li] <sup>-</sup>                                                                                                          | BP86-D4  | def2TZVPP | Li | 2.85 | 2.76 | 0.0313 | 34 |
| [Fc'(PPh <sub>2</sub> )(NMe <sub>2</sub> )<br>·PdCl][SbF <sub>6</sub> ] <sub>2</sub>                                                                | BP86     | def2TZVP  | Pd | 2.74 | 2.82 | 0.0313 | 14 |
| [Pd(dppf)(P(pC <sub>6</sub> H <sub>4</sub> CF <sub>3</sub> ) <sub>3</sub> )<br>][BF <sub>4</sub> ] <sub>2</sub>                                     | PW91     | TZP-ZORA  | Pd | 2.89 | 2.98 | 0.0311 | 5  |
| [Pd(dtbpf)I] <sup>+</sup>                                                                                                                           | PW91     | TZP-ZORA  | Pd | 2.92 | 3.01 | 0.0308 | 13 |
| [Pd(dippf)(PMe <sub>3</sub> ) <sup>2+</sup>                                                                                                         | PBE      | TZP-ZORA  | Pd | 3.02 | 3.11 | 0.0298 | 13 |
| [Pd(dippf)(PMe <sub>3</sub> ) <sup>2+</sup>                                                                                                         | PBE-D3   | TZP-ZORA  | Pd | 3.02 | 3.11 | 0.0298 | 13 |
| [{fc(NIm) <sub>2</sub> }NiCl <sub>2</sub> ]                                                                                                         | B97D     | 6-311G**  | Ni | 3.80 | 3.91 | 0.0297 | 15 |
| [Fc'(PPh <sub>2</sub> )(NMe <sub>2</sub> )<br>·PdCl][SbF <sub>6</sub> ] <sub>2</sub>                                                                | PBEh1PBE | def2TZVP  | Pd | 2.74 | 2.82 | 0.0291 | 14 |
| [Fc(NCNDIPP) <sub>2</sub> Ag] <sup>-</sup>                                                                                                          | B3LYP-D4 | def2TZVPP | Ag | 3.15 | 3.24 | 0.0284 | 34 |
| κ <sup>3</sup> -dppf <sub>1</sub> (1p <sup>+</sup> )                                                                                                | TPSS-D3  | def2TZVP  | Fe | 4.22 | 4.34 | 0.0282 | 21 |
| [Fc'(PPh <sub>2</sub> )(NMe <sub>2</sub> )<br>·Pd(PPh <sub>2</sub> )Fc'(NMe <sub>2</sub> )] [B<br>F <sub>4</sub> ] <sub>2</sub>                     | ωB97X-D  | def2TZVP  | Pd | 2.82 | 2.90 | 0.0272 | 14 |
| [Fc(NCNDIPP) <sub>2</sub> Ag] <sup>-</sup>                                                                                                          | B3LYP-D3 | def2TZVPP | Ag | 3.15 | 3.23 | 0.0258 | 34 |
| [{fc(NIm) <sub>2</sub> }Pd(NCMe)]<br>2+                                                                                                             | B97D     | 6-311G**  | Pd | 2.63 | 2.70 | 0.0252 | 15 |
| [Pd(dtbpf)Cl] <sup>+</sup>                                                                                                                          | PW91     | TZP-ZORA  | Pd | 2.92 | 2.99 | 0.0240 | 28 |
| [Pd(dtbpf)I] <sup>+</sup>                                                                                                                           | PW91     | TZP-ZORA  | Pd | 2.92 | 2.99 | 0.0240 | 28 |
| [Pd(dtbpf)Br] <sup>+</sup>                                                                                                                          | PW91     | TZP-ZORA  | Pd | 2.92 | 2.99 | 0.0240 | 28 |
| [Pd(dtbpf)Cl] <sup>+</sup>                                                                                                                          | PW91     | TZP-ZORA  | Pd | 2.94 | 3.01 | 0.0238 | 13 |
| [Fc(NCNDIPP) <sub>2</sub> Ag] <sup>-</sup>                                                                                                          | B3LYP    | def2TZVPP | Ag | 3.15 | 3.22 | 0.0217 | 34 |
| [Fc'(PPh <sub>2</sub> )(NMe <sub>2</sub> )<br>·PdP( <i>p</i> -OMe-C <sub>6</sub> H <sub>4</sub> ) <sub>3</sub> ]<br>[BF <sub>4</sub> ] <sub>2</sub> | ωB97X-D  | def2TZVP  | Pd | 2.83 | 2.90 | 0.0216 | 14 |
| [fc(NPEt <sub>3</sub> ) <sub>2</sub> PdMe] <sup>+</sup>                                                                                             | PW91     | TZP-ZORA  | Pd | 2.78 | 2.84 | 0.0214 | 37 |
| [Fc'(PPh <sub>2</sub> )(NMe <sub>2</sub> )<br>·Pd(PPh <sub>2</sub> C <sub>5</sub> H <sub>5</sub> )] [SbF <sub>6</sub> ] <sub>2</sub>                | ωB97X-D  | def2TZVP  | Pd | 2.81 | 2.87 | 0.0210 | 14 |
| [Pd(dippf)(PMe <sub>3</sub> ) <sup>2+</sup>                                                                                                         | PW91     | TZP-ZORA  | Pd | 3.02 | 3.08 | 0.0199 | 13 |
| [Fc(NCNDIPP) <sub>2</sub> Ag] <sup>-</sup>                                                                                                          | BP86     | def2TZVPP | Ag | 3.15 | 3.21 | 0.0195 | 34 |

|                                                                                                                                                |                          |             |                  |      |      |        |    |
|------------------------------------------------------------------------------------------------------------------------------------------------|--------------------------|-------------|------------------|------|------|--------|----|
| $[\text{Fc}'(\text{PPh}_2)(\text{NMe}_2) \cdot \text{Pd}(\text{PPh}_2)\text{Fc}'(\text{NMe}_2)][\text{BF}_4]_2$                                | $\omega$ B97X-D          | def2TZVP    | Pd               | 2.83 | 2.88 | 0.0191 | 14 |
| $[\{\text{fc}(\text{NIm})_2\}\text{NiCl}]^+$                                                                                                   | B97D                     | 6-311G**    | Ni               | 2.63 | 2.68 | 0.0187 | 15 |
| $[\text{Fc}(\text{NCNDIPP})_2\text{Ag}]^-$                                                                                                     | BP86-D4                  | def2TZVPP   | Ag               | 3.15 | 3.21 | 0.0185 | 34 |
| $[\text{Fc}(\text{NCNDIPP})_2\text{Cu}]^-$                                                                                                     | BP86-D3                  | def2TZVPP   | Cu <sup>I</sup>  | 3.17 | 3.22 | 0.0170 | 34 |
| $[\text{Fc}(\text{NCNDIPP})_2\text{Cu}]^-$                                                                                                     | B3LYP-D3                 | def2TZVPP   | Cu <sup>I</sup>  | 3.17 | 3.22 | 0.0167 | 34 |
| $[\text{Fc}(\text{NCNDIPP})_2\text{Cu}]^-$                                                                                                     | B3LYP-D4                 | def2TZVPP   | Cu <sup>I</sup>  | 3.17 | 3.22 | 0.0167 | 34 |
| $[\{\text{fc}(\text{NIm})_2\}\text{Ni}(\text{NCMe})]^{2+}$                                                                                     | B97D                     | 6-311G**    | Ni               | 2.63 | 2.67 | 0.0153 | 15 |
| $[\text{Fc}(\text{NCNDIPP})_2\text{Cu}]$                                                                                                       | BP86-D3                  | def2TZVPP   | Cu <sup>II</sup> | 3.12 | 3.07 | 0.0149 | 34 |
| $[\text{Fc}(\text{NCNDIPP})_2\text{Li}]^-$                                                                                                     | B3LYP                    | def2TZVPP   | Li               | 2.85 | 2.89 | 0.0148 | 34 |
| $[\{\text{fc}(\text{NIm})_2\}\text{PdCl}]^+$                                                                                                   | B97D                     | 6-311G**    | Pd               | 2.67 | 2.71 | 0.0142 | 15 |
| $[\text{Fc}(\text{NCNDIPP})_2\text{Ag}]^-$                                                                                                     | BP86-D3                  | def2TZVPP   | Ag               | 3.15 | 3.20 | 0.0141 | 34 |
| $[\text{Fc}(\text{NCNDIPP})_2\text{Cu}]^-$                                                                                                     | BP86-D4                  | def2TZVPP   | Cu <sup>I</sup>  | 3.17 | 3.21 | 0.0136 | 34 |
| $[\text{Fc}(\text{NCNDIPP})_2\text{Li}]^-$                                                                                                     | B3LYP-D4                 | def2TZVPP   | Li               | 2.85 | 2.81 | 0.0130 | 34 |
| $[\text{Fc}(\text{NCNDIPP})_2\text{Li}]^-$                                                                                                     | BP86                     | def2TZVPP   | Li               | 2.85 | 2.88 | 0.0130 | 34 |
| $[\text{Fc}(\text{NCNDIPP})_2\text{Cu}]$                                                                                                       | BP86                     | def2TZVPP   | Cu <sup>II</sup> | 3.12 | 3.15 | 0.0117 | 34 |
| $[\text{Fc}(\text{NCNDIPP})_2\text{Li}]^-$                                                                                                     | BP86-D3                  | def2TZVPP   | Li               | 2.85 | 2.81 | 0.0109 | 34 |
| $[\text{PdCl}\{\{\text{Fe}(\eta^5\text{-C}_5\text{H}_4\text{NvC}(\text{NR}_2)_2\}_2\text{-}\kappa^3\text{N, N}',\text{Fe})\}_2[\text{PdCl}_4]$ | M11/LAN L2DZ-ECP (Fe,Pd) | 6-31+G(d,p) | Pd               | 3.79 | 3.75 | 0.0102 | 35 |
| $[\text{Fc}(\text{NCNDIPP})_2\text{Cu}]$                                                                                                       | B3LYP-D4                 | def2TZVPP   | Cu <sup>II</sup> | 3.12 | 3.15 | 0.0101 | 34 |
| $[\text{Fc}(\text{NCNDIPP})_2\text{Cu}]$                                                                                                       | B3LYP                    | def2TZVPP   | Cu <sup>II</sup> | 3.12 | 3.15 | 0.0095 | 34 |
| $[\text{Fc}(\text{NCNDIPP})_2\text{Cu}]$                                                                                                       | BP86-D4                  | def2TZVPP   | Cu <sup>II</sup> | 3.12 | 3.09 | 0.0088 | 34 |
| $[\text{fc}(\text{NPPH}_3)_2\text{PdMe}]^+$                                                                                                    | PW91                     | TZP-ZORA    | Pd               | 2.80 | 2.82 | 0.0087 | 37 |
| $[\{\text{fc}(\text{NIm})_2\}\text{Pd}(\text{PMe}_3)]^{2+}$                                                                                    | B97D                     | 6-311G**    | Pd               | 2.75 | 2.77 | 0.0073 | 15 |
| $[\{\text{fc}(\text{NIm})_2\}\text{Ni}(\text{PMe}_3)]^{2+}$                                                                                    | B97D                     | 6-311G**    | Ni               | 2.74 | 2.76 | 0.0066 | 15 |
| 1                                                                                                                                              | TPSS                     | def2TZVP    | Ni               | 4.24 | 4.27 | 0.0057 | 21 |
| $[\text{fc}(\text{NPPH}_3)_2\text{NiPh}]^+$                                                                                                    | PW91                     | TZP-ZORA    | Ni               | 2.82 | 2.81 | 0.0051 | 37 |
| $[\text{Fc}(\text{NCNDIPP})_2\text{Cu}]^-$                                                                                                     | BP86                     | def2TZVPP   | Cu <sup>I</sup>  | 3.17 | 3.19 | 0.0047 | 34 |
| $[\text{Fc}(\text{NCNDIPP})_2\text{Cu}]$                                                                                                       | B3LYP-D3                 | def2TZVPP   | Cu <sup>II</sup> | 3.12 | 3.13 | 0.0047 | 34 |
| $[\text{Fc}(\text{NCNDIPP})_2\text{Cu}]^-$                                                                                                     | B3LYP                    | def2TZVPP   | Cu <sup>I</sup>  | 3.17 | 3.18 | 0.0038 | 34 |
| $[\{\text{fc}(\text{NIm})_2\}\text{PdCl}_2]$                                                                                                   | B97D                     | 6-311G**    | Pd               | 4.00 | 3.99 | 0.0025 | 15 |

**Table S2** CCDC numbers for **1-6**

| Structure | CCDC#   | reference |
|-----------|---------|-----------|
| 1         | 980227  | 13        |
| 2         | 277349  | 38        |
| 3         | 1569204 | 37        |
| 4         | 1117672 | 39        |
| 5         | 114238  | 36        |
| 6         | 114239  | 36        |

**Table S3** The obtained  $d_{\text{Fe-M}}$  (in Å) applying different basis sets using TPSSh DFT functional

| Structure | $d_{\text{Fe-M,exp}}$<br>[Å] | 3-21G | def2-TZVP | 6-311+G**<br>and for metal atoms<br>LANL2DZ | def2-TZVP and<br>for metal atoms<br>TZP-ZORA |
|-----------|------------------------------|-------|-----------|---------------------------------------------|----------------------------------------------|
| 1         | 2.939                        | 2.836 | 2.935     | 2.919                                       | 2.876                                        |
| 2         | 2.663                        | 2.666 | 2.713     | 2.718                                       | 2.690                                        |
| 3         | 2.781                        | 2.769 | 2.808     | 2.818                                       | 2.767                                        |
| 4         | 2.879                        | 2.793 | 2.940     | 2.919                                       | 2.883                                        |
| 5         | 2.886                        | 2.552 | 2.892     | 2.853                                       | 2.891                                        |

**Table S4.** Computed and experimental values of Fe-M distances ( $d_{\text{Fe-M}}$ ) in Å for structures **1-6**

| Structure | $d_{\text{Fe-M}}$ | TPSSh | M06-<br>2X | CAM-<br>B3LYP | CAM-<br>B3LYP-<br>D3 | PW91 | B3LYP | B3LYP-<br>D3 | ωb97X-<br>D | BP86 |
|-----------|-------------------|-------|------------|---------------|----------------------|------|-------|--------------|-------------|------|
| 1         | 2.94              | 3.05  | 3.08       | 2.99          | 3.00                 | 2.94 | 3.06  | 3.01         | 3.03        | 2.98 |
| 2         | 2.66              | 2.77  | 2.78       | 2.75          | 2.74                 | 2.71 | 2.83  | 2.75         | 2.76        | 2.73 |
| 3         | 2.78              | 2.89  | 2.9        | 2.84          | 2.84                 | 2.81 | 2.94  | 2.86         | 2.87        | 2.83 |
| 4         | 2.88              | 3.04  | 3.05       | 2.96          | 2.99                 | 2.94 | 3.03  | 2.99         | 3.00        | 2.97 |
| 5         | 2.89              | 3.00  | 2.98       | 2.91          | 2.93                 | 2.89 | 2.95  | 2.96         | 2.95        | 2.90 |
| 6         | 4.27              | 4.29  | 4.20       | 4.16          | 4.29                 | 4.25 | 4.1   | 4.24         | 4.16        | 4.27 |

**Table S5** Computed ring tilts for structures with an eclipsed geometry in conjunction of the def2-TZVP basis set with pseudopotentials on the metal atoms.

| Structure | Functional      | $d_{\text{Fe-M}}$ [Å] | $\alpha_{\text{exp.}}$ [°] | $\alpha_{\text{calc.}}$ [°] | $h_{\text{rel}}$ [-] |
|-----------|-----------------|-----------------------|----------------------------|-----------------------------|----------------------|
| 3         | B3LYP           | 2.781                 | 15.324                     | 12.900                      | 0.158                |
| 3         | B3LYP-D3        | 2.781                 | 15.324                     | 12.481                      | 0.186                |
| 3         | BP86            | 2.781                 | 15.324                     | 14.266                      | 0.069                |
| 3         | CAM-B3LYP       | 2.781                 | 15.324                     | 12.827                      | 0.163                |
| 3         | CAM-B3LYP-D3    | 2.781                 | 15.324                     | 12.688                      | 0.172                |
| 3         | M06-2X          | 2.781                 | 15.324                     | 13.556                      | 0.115                |
| 3         | PW91            | 2.781                 | 15.324                     | 14.406                      | 0.060                |
| 3         | TPSSh           | 2.781                 | 15.324                     | 14.373                      | 0.062                |
| 3         | b97X-D          | 2.781                 | 15.324                     | 14.333                      | 0.065                |
| 4         | B3LYP           | 2.879                 | 20.045                     | 17.665                      | 0.119                |
| 4         | B3LYP-D3        | 2.879                 | 20.045                     | 17.496                      | 0.127                |
| 4         | BP86            | 2.879                 | 20.045                     | 19.372                      | 0.034                |
| 4         | CAM-B3LYP       | 2.879                 | 20.045                     | 17.434                      | 0.130                |
| 4         | CAM-B3LYP-D3    | 2.879                 | 20.045                     | 17.347                      | 0.135                |
| 4         | M06-2X          | 2.879                 | 20.045                     | 15.289                      | 0.237                |
| 4         | PW91            | 2.879                 | 20.045                     | 19.588                      | 0.023                |
| 4         | TPSSh           | 2.879                 | 20.045                     | 19.171                      | 0.044                |
| 4         | $\omega$ b97X-D | 2.879                 | 20.045                     | 17.597                      | 0.122                |
| 5         | B3LYP           | 2.886                 | 15.139                     | 13.248                      | 0.125                |
| 5         | B3LYP-D3        | 2.886                 | 15.139                     | 13.627                      | 0.100                |
| 5         | BP86            | 2.886                 | 15.139                     | 15.292                      | 0.010                |
| 5         | CAM-B3LYP       | 2.886                 | 15.139                     | 13.088                      | 0.135                |
| 5         | CAM-B3LYP-D3    | 2.886                 | 15.139                     | 13.325                      | 0.120                |
| 5         | M06-2X          | 2.886                 | 15.139                     | 11.221                      | 0.259                |
| 5         | PW91            | 2.886                 | 15.139                     | 15.537                      | 0.026                |
| 5         | TPSSh           | 2.886                 | 15.139                     | 15.030                      | 0.007                |
| 5         | $\omega$ b97X-D | 2.781                 | 15.139                     | 13.494                      | 0.109                |

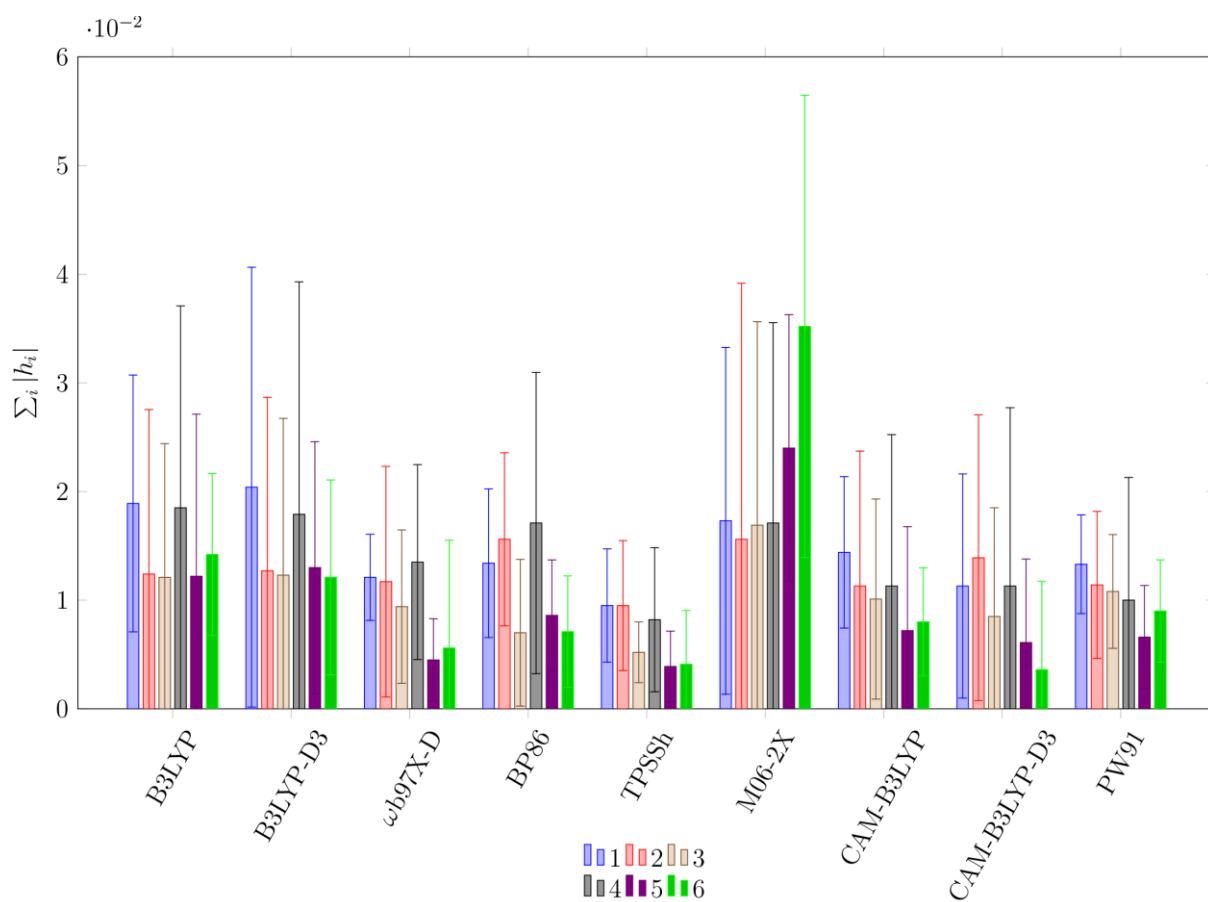

**Fig. S1** Mean absolute values of relative errors including bond lengths depicted in **Fig. S2**

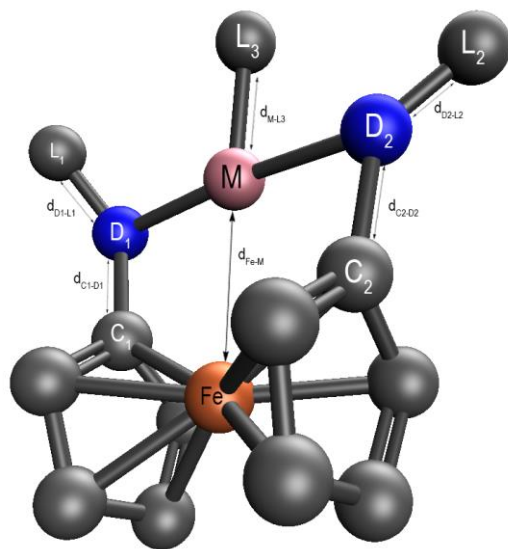

**Fig. S2** General ball-stick figure of the  $\kappa^3$ -bis(donor)-ferrocenophanes with notable bond lengths (d) discussed in **Fig. S1**



**Table S6** Experimental, and calculated bond lengths of **1**

| B3LYP   | d <sub>exp,1</sub> [Å] | d <sub>calc,1</sub> [Å] | h <sub>rel</sub> [-] |
|---------|------------------------|-------------------------|----------------------|
| Pd-Cl   | 2.316                  | 2.306                   | -0.004               |
| P-Pd    | 2.278                  | 2.324                   | 0.020                |
| P-Pd    | 2.271                  | 2.332                   | 0.026                |
| P-C     | 1.798                  | 1.816                   | 0.010                |
| P-C     | 1.796                  | 1.822                   | 0.015                |
| Fe-Pd   | 2.939                  | 3.048                   | 0.036                |
|         |                        |                         |                      |
| TPSSh   | d <sub>exp,1</sub> [Å] | d <sub>calc,1</sub> [Å] | h <sub>rel</sub> [-] |
| Pd-Cl   | 2.316                  | 2.293                   | -0.010               |
| P-Pd    | 2.278                  | 2.314                   | 0.015                |
| P-Pd    | 2.271                  | 2.303                   | 0.014                |
| P-C     | 1.798                  | 1.815                   | 0.009                |
| P-C     | 1.796                  | 1.808                   | 0.007                |
| Fe-Pd   | 2.939                  | 2.936                   | -0.001               |
|         |                        |                         |                      |
| ωb97X-D | d <sub>exp,1</sub> [Å] | d <sub>calc,1</sub> [Å] | h <sub>rel</sub> [-] |
| Pd-Cl   | 2.316                  | 2.293                   | -0.010               |
| P-Pd    | 2.278                  | 2.314                   | 0.015                |
| P-Pd    | 2.271                  | 2.303                   | 0.014                |
| P-C     | 1.798                  | 1.815                   | 0.009                |
| P-C     | 1.796                  | 1.808                   | 0.007                |
| Fe-Pd   | 2.939                  | 2.988                   | 0.017                |
|         |                        |                         |                      |
| BP86    | d <sub>exp,1</sub> [Å] | d <sub>calc,1</sub> [Å] | h <sub>rel</sub> [-] |
| Pd-Cl   | 2.316                  | 2.312                   | -0.002               |
| P-Pd    | 2.278                  | 2.308                   | 0.013                |
| P-Pd    | 2.271                  | 2.313                   | 0.018                |
| P-C     | 1.798                  | 1.817                   | 0.011                |
| P-C     | 1.796                  | 1.823                   | 0.015                |
| Fe-Pd   | 2.939                  | 3.002                   | 0.021                |
|         |                        |                         |                      |
| M06-2X  | d <sub>exp,1</sub> [Å] | d <sub>calc,1</sub> [Å] | h <sub>rel</sub> [-] |
| Pd-Cl   | 2.316                  | 2.302                   | -0.006               |
| P-Pd    | 2.278                  | 2.287                   | 0.004                |
| P-Pd    | 2.271                  | 2.345                   | 0.031                |
| P-C     | 1.798                  | 1.820                   | 0.012                |
| P-C     | 1.796                  | 1.808                   | 0.007                |
| Fe-Pd   | 2.939                  | 3.062                   | 0.040                |

| CAM-B3LYP    | $d_{\text{exp},1}$ [Å] | $d_{\text{calc},1}$ [Å] | $h_{\text{rel}}$ [-] |
|--------------|------------------------|-------------------------|----------------------|
| Pd-Cl        | 2.316                  | 2.277                   | -0.017               |
| P-Pd         | 2.278                  | 2.303                   | 0.011                |
| P-Pd         | 2.271                  | 2.315                   | 0.019                |
| P-C          | 1.798                  | 1.814                   | 0.009                |
| P-C          | 1.796                  | 1.807                   | 0.006                |
| Fe-Pd        | 2.939                  | 3.011                   | 0.024                |
|              |                        |                         |                      |
| PW91         | $d_{\text{exp},1}$ [Å] | $d_{\text{calc},1}$ [Å] | $h_{\text{rel}}$ [-] |
| Pd-Cl        | 2.316                  | 2.307                   | -0.004               |
| P-Pd         | 2.278                  | 2.303                   | 0.011                |
| P-Pd         | 2.271                  | 2.309                   | 0.016                |
| P-C          | 1.798                  | 1.819                   | 0.012                |
| P-C          | 1.796                  | 1.813                   | 0.010                |
| Fe-Pd        | 2.939                  | 2.983                   | 0.015                |
|              |                        |                         |                      |
| CAM-B3LYP-D3 | $d_{\text{exp},1}$ [Å] | $d_{\text{calc},1}$ [Å] | $h_{\text{rel}}$ [-] |
| Pd-Cl        | 2.316                  | 2.275                   | -0.018               |
| P-Pd         | 2.278                  | 2.301                   | 0.010                |
| P-Pd         | 2.271                  | 2.288                   | 0.007                |
| P-C          | 1.798                  | 1.804                   | 0.003                |
| P-C          | 1.796                  | 1.813                   | 0.009                |
| Fe-Pd        | 2.939                  | 3.033                   | 0.031                |
|              |                        |                         |                      |
| B3LYP-D3     | $d_{\text{exp},1}$ [Å] | $d_{\text{calc},1}$ [Å] | $h_{\text{rel}}$ [-] |
| Pd-Cl        | 2.316                  | 2.300                   | -0.007               |
| P-Pd         | 2.278                  | 2.310                   | 0.014                |
| P-Pd         | 2.271                  | 2.302                   | 0.013                |
| P-C          | 1.798                  | 1.895                   | 0.051                |
| P-C          | 1.796                  | 1.820                   | 0.013                |
| Fe-Pd        | 2.939                  | 3.077                   | 0.045                |

**Table S7** Experimental, and calculated bond lengths of **2**

| B3LYP   | d <sub>exp,2</sub> [Å] | d <sub>calc,2</sub> [Å] | h <sub>rel</sub> [-] |
|---------|------------------------|-------------------------|----------------------|
| Pd-Cl   | 2.345                  | 2.332                   | -0.006               |
| P-N     | 1.614                  | 1.619                   | 0.003                |
| P-N     | 1.614                  | 1.619                   | 0.003                |
| N-Pd    | 2.049                  | 2.061                   | 0.006                |
| N-Pd    | 2.030                  | 2.061                   | 0.015                |
| Fe-Pd   | 2.663                  | 2.775                   | 0.040                |
|         |                        |                         |                      |
| TPSSh   | d <sub>exp,2</sub> [Å] | d <sub>calc,2</sub> [Å] | h <sub>rel</sub> [-] |
| Pd-Cl   | 2.345                  | 2.318                   | -0.012               |
| P-N     | 1.614                  | 1.631                   | 0.010                |
| P-N     | 1.614                  | 1.626                   | 0.007                |
| N-Pd    | 2.049                  | 2.048                   | 0.000                |
| N-Pd    | 2.030                  | 2.048                   | 0.009                |
| Fe-Pd   | 2.663                  | 2.713                   | 0.018                |
|         |                        |                         |                      |
| ωb97X-D | d <sub>exp,2</sub> [Å] | d <sub>calc,2</sub> [Å] | h <sub>rel</sub> [-] |
| Pd-Cl   | 2.345                  | 2.318                   | -0.012               |
| P-N     | 1.614                  | 1.631                   | 0.010                |
| P-N     | 1.614                  | 1.626                   | 0.007                |
| N-Pd    | 2.049                  | 2.048                   | 0.000                |
| N-Pd    | 2.030                  | 2.048                   | 0.009                |
| Fe-Pd   | 2.663                  | 2.748                   | 0.031                |
|         |                        |                         |                      |
| BP86    | d <sub>exp,2</sub> [Å] | d <sub>calc,2</sub> [Å] | h <sub>rel</sub> [-] |
| Pd-Cl   | 2.345                  | 2.331                   | -0.006               |
| P-N     | 1.614                  | 1.641                   | 0.016                |
| P-N     | 1.614                  | 1.641                   | 0.016                |
| N-Pd    | 2.049                  | 2.066                   | 0.008                |
| N-Pd    | 2.030                  | 2.066                   | 0.018                |
| Fe-Pd   | 2.663                  | 2.738                   | 0.027                |
|         |                        |                         |                      |
| M06-2X  | d <sub>exp,2</sub> [Å] | d <sub>calc,2</sub> [Å] | h <sub>rel</sub> [-] |
| Pd-Cl   | 2.345                  | 2.327                   | -0.008               |
| P-N     | 1.614                  | 1.618                   | 0.002                |
| P-N     | 1.614                  | 1.618                   | 0.002                |
| N-Pd    | 2.049                  | 2.058                   | 0.004                |
| N-Pd    | 2.030                  | 2.058                   | 0.014                |
| Fe-Pd   | 2.663                  | 2.830                   | 0.059                |

| CAM-B3IYP    | $d_{\text{exp},2}$ [Å] | $d_{\text{calc},2}$ [Å] | $h_{\text{rel}}$ [-] |
|--------------|------------------------|-------------------------|----------------------|
| Pd-Cl        | 2.345                  | 2.305                   | -0.017               |
| P-N          | 1.614                  | 1.608                   | -0.004               |
| P-N          | 1.614                  | 1.608                   | -0.004               |
| N-Pd         | 2.049                  | 2.032                   | -0.008               |
| N-Pd         | 2.030                  | 2.032                   | 0.001                |
| Fe-Pd        | 2.663                  | 2.754                   | 0.033                |
|              |                        |                         |                      |
| PW91         | $d_{\text{exp},2}$ [Å] | $d_{\text{calc},2}$ [Å] | $h_{\text{rel}}$ [-] |
| Pd-Cl        | 2.345                  | 2.329                   | -0.007               |
| P-N          | 1.614                  | 1.638                   | 0.014                |
| P-N          | 1.614                  | 1.638                   | 0.014                |
| N-Pd         | 2.049                  | 2.062                   | 0.006                |
| N-Pd         | 2.030                  | 2.062                   | 0.016                |
| Fe-Pd        | 2.663                  | 2.729                   | 0.024                |
|              |                        |                         |                      |
| CAM-B3IYP-D3 | $d_{\text{exp},2}$ [Å] | $d_{\text{calc},2}$ [Å] | $h_{\text{rel}}$ [-] |
| Pd-Cl        | 2.345                  | 2.304                   | -0.018               |
| P-N          | 1.614                  | 1.609                   | -0.003               |
| P-N          | 1.614                  | 1.609                   | -0.003               |
| N-Pd         | 2.049                  | 2.030                   | -0.010               |
| N-Pd         | 2.030                  | 2.030                   | 0.000                |
| Fe-Pd        | 2.663                  | 2.757                   | 0.034                |
|              |                        |                         |                      |
| B3LYP-D3     | $d_{\text{exp},2}$ [Å] | $d_{\text{calc},2}$ [Å] | $h_{\text{rel}}$ [-] |
| Pd-Cl        | 2.345                  | 2.329                   | -0.007               |
| P-N          | 1.614                  | 1.621                   | 0.004                |
| P-N          | 1.614                  | 1.621                   | 0.004                |
| N-Pd         | 2.049                  | 2.057                   | 0.004                |
| N-Pd         | 2.030                  | 2.057                   | 0.013                |
| Fe-Pd        | 2.663                  | 2.781                   | 0.043                |

**Table S8** Experimental, and calculated bond lengths of **3**

| B3LYP   | d <sub>exp,3</sub> [Å] | d <sub>calc,3</sub> [Å] | h <sub>rel</sub> [-] |
|---------|------------------------|-------------------------|----------------------|
| Pd-N    | 2.054                  | 2.080                   | 0.012                |
| Pd-N    | 2.048                  | 2.074                   | 0.012                |
| N-P     | 1.611                  | 1.611                   | 0.000                |
| N-P     | 1.626                  | 1.612                   | -0.008               |
| Fe-Pd   | 2.781                  | 2.887                   | 0.037                |
| N-C     | 1.406                  | 1.399                   | -0.005               |
|         |                        |                         |                      |
| TPSSh   | d <sub>exp,3</sub> [Å] | d <sub>calc,3</sub> [Å] | h <sub>rel</sub> [-] |
| Pd-N    | 2.054                  | 2.060                   | 0.003                |
| Pd-N    | 2.048                  | 2.054                   | 0.003                |
| N-P     | 1.611                  | 1.615                   | 0.002                |
| N-P     | 1.626                  | 1.616                   | -0.006               |
| Fe-Pd   | 2.781                  | 2.808                   | 0.010                |
| N-C     | 1.406                  | 1.399                   | -0.005               |
|         |                        |                         |                      |
| ωb97X-D | d <sub>exp,3</sub> [Å] | d <sub>calc,3</sub> [Å] | h <sub>rel</sub> [-] |
| Pd-N    | 2.054                  | 2.060                   | 0.003                |
| Pd-N    | 2.048                  | 2.054                   | 0.003                |
| N-P     | 1.611                  | 1.615                   | 0.002                |
| N-P     | 1.626                  | 1.616                   | -0.006               |
| Fe-Pd   | 2.781                  | 2.843                   | 0.022                |
| N-C     | 1.406                  | 1.399                   | -0.005               |
|         |                        |                         |                      |
| BP86    | d <sub>exp,3</sub> [Å] | d <sub>calc,3</sub> [Å] | h <sub>rel</sub> [-] |
| Pd-N    | 2.054                  | 2.073                   | 0.009                |
| Pd-N    | 2.048                  | 2.069                   | 0.010                |
| N-P     | 1.611                  | 1.630                   | 0.012                |
| N-P     | 1.626                  | 1.629                   | 0.002                |
| Fe-Pd   | 2.781                  | 2.841                   | 0.021                |
| N-C     | 1.406                  | 1.403                   | -0.002               |
|         |                        |                         |                      |
| M06-2X  | d <sub>exp,3</sub> [Å] | d <sub>calc,3</sub> [Å] | h <sub>rel</sub> [-] |
| Pd-N    | 2.054                  | 2.088                   | 0.016                |
| Pd-N    | 2.048                  | 2.094                   | 0.022                |
| N-P     | 1.611                  | 1.605                   | -0.004               |
| N-P     | 1.626                  | 1.603                   | -0.014               |
| Fe-Pd   | 2.781                  | 2.935                   | 0.053                |
| N-C     | 1.406                  | 1.411                   | 0.004                |

| CAM-B3LYP    | $d_{\text{exp},3}$ [Å] | $d_{\text{calc},3}$ [Å] | $h_{\text{rel}}$ [-] |
|--------------|------------------------|-------------------------|----------------------|
| Pd-N         | 2.054                  | 2.046                   | -0.004               |
| Pd-N         | 2.048                  | 2.053                   | 0.003                |
| N-P          | 1.611                  | 1.602                   | -0.006               |
| N-P          | 1.626                  | 1.600                   | -0.016               |
| Fe-Pd        | 2.781                  | 2.859                   | 0.027                |
| N-C          | 1.406                  | 1.401                   | -0.004               |
|              |                        |                         |                      |
| PW91         | $d_{\text{exp},3}$ [Å] | $d_{\text{calc},3}$ [Å] | $h_{\text{rel}}$ [-] |
| Pd-N         | 2.054                  | 2.064                   | 0.005                |
| Pd-N         | 2.048                  | 2.072                   | 0.012                |
| N-P          | 1.611                  | 1.626                   | 0.009                |
| N-P          | 1.626                  | 1.627                   | 0.001                |
| Fe-Pd        | 2.781                  | 2.828                   | 0.017                |
| N-C          | 1.406                  | 1.397                   | -0.006               |
|              |                        |                         |                      |
| CAM-B3LYP-D3 | $d_{\text{exp},3}$ [Å] | $d_{\text{calc},3}$ [Å] | $h_{\text{rel}}$ [-] |
| Pd-N         | 2.054                  | 2.050                   | -0.002               |
| Pd-N         | 2.048                  | 2.040                   | -0.004               |
| N-P          | 1.611                  | 1.600                   | -0.007               |
| N-P          | 1.626                  | 1.600                   | -0.016               |
| Fe-Pd        | 2.781                  | 2.868                   | 0.030                |
| N-C          | 1.406                  | 1.397                   | -0.007               |
|              |                        |                         |                      |
| B3LYP-D3     | $d_{\text{exp},3}$ [Å] | $d_{\text{calc},3}$ [Å] | $h_{\text{rel}}$ [-] |
| Pd-N         | 2.054                  | 2.074                   | 0.010                |
| Pd-N         | 2.048                  | 2.063                   | 0.007                |
| N-P          | 1.611                  | 1.610                   | -0.001               |
| N-P          | 1.626                  | 1.610                   | -0.010               |
| Fe-Pd        | 2.781                  | 2.904                   | 0.042                |
| N-C          | 1.406                  | 1.397                   | -0.006               |

**Table S9** Experimental, and calculated bond lengths of **4**

| B3LYP   | $d_{\text{exp},4}$ [Å] | $d_{\text{calc},4}$ [Å] | $h_{\text{rel}}$ [-] |
|---------|------------------------|-------------------------|----------------------|
| P-Pd    | 2.241                  | 2.274                   | 0.014                |
| Pd-S    | 2.308                  | 2.342                   | 0.014                |
| S-Pd    | 2.294                  | 2.329                   | 0.015                |
| S-C     | 1.719                  | 1.736                   | 0.010                |
| S-C     | 1.741                  | 1.737                   | -0.002               |
| Fe-Pd   | 2.879                  | 3.037                   | 0.052                |
|         |                        |                         |                      |
| TPSSh   | $d_{\text{exp},4}$ [Å] | $d_{\text{calc},4}$ [Å] | $h_{\text{rel}}$ [-] |
| P-Pd    | 2.241                  | 2.248                   | 0.003                |
| Pd-S    | 2.308                  | 2.322                   | 0.006                |
| S-Pd    | 2.294                  | 2.309                   | 0.006                |
| S-C     | 1.719                  | 1.732                   | 0.008                |
| S-C     | 1.741                  | 1.734                   | -0.004               |
| Fe-Pd   | 2.879                  | 2.940                   | 0.021                |
|         |                        |                         |                      |
| wb97X-D | $d_{\text{exp},4}$ [Å] | $d_{\text{calc},4}$ [Å] | $h_{\text{rel}}$ [-] |
| P-Pd    | 2.241                  | 2.251                   | 0.004                |
| Pd-S    | 2.308                  | 2.300                   | -0.003               |
| S-Pd    | 2.294                  | 2.314                   | 0.008                |
| S-C     | 1.719                  | 1.733                   | 0.008                |
| S-C     | 1.741                  | 1.732                   | -0.005               |
| Fe-Pd   | 2.879                  | 2.957                   | 0.026                |
|         |                        |                         |                      |
| BP86    | $d_{\text{exp},4}$ [Å] | $d_{\text{calc},4}$ [Å] | $h_{\text{rel}}$ [-] |
| P-Pd    | 2.241                  | 2.254                   | 0.006                |
| Pd-S    | 2.308                  | 2.322                   | 0.006                |
| S-Pd    | 2.294                  | 2.335                   | 0.017                |
| S-C     | 1.719                  | 1.737                   | 0.010                |
| S-C     | 1.741                  | 1.738                   | -0.002               |
| Fe-Pd   | 2.879                  | 2.992                   | 0.038                |
|         |                        |                         |                      |
| M06-2X  | $d_{\text{exp},4}$ [Å] | $d_{\text{calc},4}$ [Å] | $h_{\text{rel}}$ [-] |
| P-Pd    | 2.241                  | 2.219                   | -0.010               |
| Pd-S    | 2.308                  | 2.318                   | 0.004                |
| S-Pd    | 2.294                  | 2.334                   | 0.017                |
| S-C     | 1.719                  | 1.745                   | 0.015                |
| S-C     | 1.741                  | 1.746                   | 0.003                |
| Fe-Pd   | 2.879                  | 3.031                   | 0.050                |

| CAM-B3LYP    | $d_{\text{exp},4}$ [Å] | $d_{\text{calc},4}$ [Å] | $h_{\text{rel}}$ [-] |
|--------------|------------------------|-------------------------|----------------------|
| P-Pd         | 2.241                  | 2.253                   | 0.005                |
| Pd-S         | 2.308                  | 2.302                   | -0.003               |
| S-Pd         | 2.294                  | 2.314                   | 0.009                |
| S-C          | 1.719                  | 1.732                   | 0.007                |
| S-C          | 1.741                  | 1.733                   | -0.004               |
| Fe-Pd        | 2.879                  | 2.992                   | 0.038                |
|              |                        |                         |                      |
| PW91         | $d_{\text{exp},4}$ [Å] | $d_{\text{calc},4}$ [Å] | $h_{\text{rel}}$ [-] |
| P-Pd         | 2.241                  | 2.249                   | 0.004                |
| Pd-S         | 2.308                  | 2.318                   | 0.004                |
| S-Pd         | 2.294                  | 2.330                   | 0.016                |
| S-C          | 1.719                  | 1.733                   | 0.008                |
| S-C          | 1.741                  | 1.734                   | -0.004               |
| Fe-Pd        | 2.879                  | 2.971                   | 0.031                |
|              |                        |                         |                      |
| CAM-B3LYP-D3 | $d_{\text{exp},4}$ [Å] | $d_{\text{calc},4}$ [Å] | $h_{\text{rel}}$ [-] |
| P-Pd         | 2.241                  | 2.241                   | 0.000                |
| Pd-S         | 2.308                  | 2.313                   | 0.002                |
| S-Pd         | 2.294                  | 2.301                   | 0.003                |
| S-C          | 1.719                  | 1.733                   | 0.008                |
| S-C          | 1.741                  | 1.734                   | -0.004               |
| Fe-Pd        | 2.879                  | 3.003                   | 0.041                |
|              |                        |                         |                      |
| B3LYP-D3     | $d_{\text{exp},4}$ [Å] | $d_{\text{calc},4}$ [Å] | $h_{\text{rel}}$ [-] |
| P-Pd         | 2.241                  | 2.255                   | 0.006                |
| Pd-S         | 2.308                  | 2.339                   | 0.013                |
| S-Pd         | 2.294                  | 2.327                   | 0.014                |
| S-C          | 1.719                  | 1.739                   | 0.012                |
| S-C          | 1.741                  | 1.738                   | -0.001               |
| Fe-Pd        | 2.879                  | 3.052                   | 0.057                |



**Table S10** Experimental, and calculated bond lengths of **5**

| B3LYP           | $d_{\text{exp},5}$ [Å] | $d_{\text{calc},5}$ [Å] | $h_{\text{rel}}$ [-] |
|-----------------|------------------------|-------------------------|----------------------|
| S-Ni            | 2.159                  | 2.162                   | 0.001                |
| S-Ni            | 2.139                  | 2.146                   | 0.003                |
| Ni-P            | 2.136                  | 2.103                   | -0.016               |
| Ni-Fe           | 2.886                  | 3.000                   | 0.038                |
| C-S             | 1.728                  | 1.742                   | 0.008                |
| C-S             | 1.736                  | 1.743                   | 0.004                |
|                 |                        |                         |                      |
| TPSSh           | $d_{\text{exp},5}$ [Å] | $d_{\text{calc},5}$ [Å] | $h_{\text{rel}}$ [-] |
| S-Ni            | 2.159                  | 2.168                   | 0.004                |
| Ni-S            | 2.139                  | 2.160                   | 0.010                |
| Ni-P            | 2.136                  | 2.128                   | -0.004               |
| Ni-Fe           | 2.890                  | 2.890                   | 0.000                |
| C-S             | 1.728                  | 1.735                   | 0.004                |
| C-S             | 1.736                  | 1.735                   | 0.000                |
|                 |                        |                         |                      |
| $\omega$ b97X-D | $d_{\text{exp},5}$ [Å] | $d_{\text{calc},5}$ [Å] | $h_{\text{rel}}$ [-] |
| S-Ni            | 2.159                  | 2.159                   | 0.000                |
| Ni-S            | 2.139                  | 2.159                   | 0.009                |
| Ni-P            | 2.136                  | 2.141                   | 0.003                |
| Ni-Fe           | 2.890                  | 2.910                   | 0.007                |
| C-S             | 1.728                  | 1.738                   | 0.006                |
| C-S             | 1.736                  | 1.738                   | 0.001                |
|                 |                        |                         |                      |
| BP86            | $d_{\text{exp},5}$ [Å] | $d_{\text{calc},5}$ [Å] | $h_{\text{rel}}$ [-] |
| S-Ni            | 2.159                  | 2.177                   | 0.008                |
| Ni-S            | 2.139                  | 2.171                   | 0.015                |
| Ni-P            | 2.136                  | 2.122                   | -0.006               |
| Ni-Fe           | 2.890                  | 2.928                   | 0.013                |
| C-S             | 1.728                  | 1.739                   | 0.006                |
| C-S             | 1.736                  | 1.739                   | 0.002                |
|                 |                        |                         |                      |
| M06-2X          | $d_{\text{exp},5}$ [Å] | $d_{\text{calc},5}$ [Å] | $h_{\text{rel}}$ [-] |
| S-Ni            | 2.159                  | 2.204                   | 0.020                |
| Ni-S            | 2.139                  | 2.204                   | 0.029                |
| Ni-P            | 2.136                  | 2.231                   | 0.043                |
| Ni-Fe           | 2.890                  | 2.954                   | 0.022                |
| C-S             | 1.728                  | 1.753                   | 0.015                |
| C-S             | 1.736                  | 1.754                   | 0.010                |

| CAM-B3LYP    | $d_{\text{exp},5}$ [Å] | $d_{\text{calc},5}$ [Å] | $h_{\text{rel}}$ [-] |
|--------------|------------------------|-------------------------|----------------------|
| S-Ni         | 2.159                  | 2.157                   | -0.001               |
| Ni-S         | 2.139                  | 2.157                   | 0.008                |
| Ni-P         | 2.136                  | 2.138                   | 0.001                |
| Ni-Fe        | 2.890                  | 2.960                   | 0.024                |
| C-S          | 1.728                  | 1.738                   | 0.006                |
| C-S          | 1.736                  | 1.738                   | 0.001                |
|              |                        |                         |                      |
| PW91         | $d_{\text{exp},5}$ [Å] | $d_{\text{calc},5}$ [Å] | $h_{\text{rel}}$ [-] |
| S-Ni         | 2.159                  | 2.170                   | 0.005                |
| Ni-S         | 2.139                  | 2.170                   | 0.014                |
| Ni-P         | 2.136                  | 2.117                   | -0.009               |
| Ni-Fe        | 2.890                  | 2.898                   | 0.003                |
| C-S          | 1.728                  | 1.735                   | 0.004                |
| C-S          | 1.736                  | 1.735                   | -0.001               |
|              |                        |                         |                      |
| CAM-B3LYP-D3 | $d_{\text{exp},5}$ [Å] | $d_{\text{calc},5}$ [Å] | $h_{\text{rel}}$ [-] |
| S-Ni         | 2.159                  | 2.156                   | -0.002               |
| Ni-S         | 2.139                  | 2.155                   | 0.007                |
| Ni-P         | 2.136                  | 2.130                   | -0.003               |
| Ni-Fe        | 2.890                  | 2.948                   | 0.020                |
| C-S          | 1.728                  | 1.738                   | 0.006                |
| C-S          | 1.736                  | 1.738                   | 0.001                |
|              |                        |                         |                      |
| B3LYP-D3     | $d_{\text{exp},5}$ [Å] | $d_{\text{calc},5}$ [Å] | $h_{\text{rel}}$ [-] |
| S-Ni         | 2.159                  | 2.184                   | 0.011                |
| Ni-S         | 2.139                  | 2.176                   | 0.017                |
| Ni-P         | 2.136                  | 2.145                   | 0.004                |
| Ni-Fe        | 2.886                  | 2.985                   | 0.033                |
| C-S          | 1.728                  | 1.742                   | 0.008                |
| C-S          | 1.736                  | 1.741                   | 0.003                |

**Table S11** Experimental, and calculated bond lengths of **6**

| B3LYP           | $d_{\text{exp},6}$ [Å] | $d_{\text{calc},6}$ [Å] | $h_{\text{rel}}$ [-] |
|-----------------|------------------------|-------------------------|----------------------|
| S-Ni            | 2.200                  | 2.228                   | 0.013                |
| S-Ni            | 2.206                  | 2.228                   | 0.010                |
| P-Ni            | 2.178                  | 2.230                   | 0.023                |
| P-Ni            | 2.178                  | 2.230                   | 0.023                |
| Ni-Fe           | 4.269                  | 4.287                   | 0.004                |
| C-S             | 1.748                  | 1.763                   | 0.008                |
|                 |                        |                         |                      |
| TPSSh           | $d_{\text{exp},6}$ [Å] | $d_{\text{calc},6}$ [Å] | $h_{\text{rel}}$ [-] |
| S-Ni            | 2.200                  | 2.201                   | 0.000                |
| S-Ni            | 2.206                  | 2.201                   | -0.002               |
| P-Ni            | 2.178                  | 2.178                   | 0.000                |
| P-Ni            | 2.178                  | 2.178                   | 0.000                |
| Ni-Fe           | 4.269                  | 4.246                   | -0.006               |
| C-S             | 1.748                  | 1.759                   | 0.006                |
|                 |                        |                         |                      |
| $\omega$ b97X-D | $d_{\text{exp},6}$ [Å] | $d_{\text{calc},6}$ [Å] | $h_{\text{rel}}$ [-] |
| S-Ni            | 2.200                  | 2.201                   | 0.000                |
| S-Ni            | 2.206                  | 2.201                   | -0.002               |
| P-Ni            | 2.178                  | 2.178                   | 0.000                |
| P-Ni            | 2.178                  | 2.178                   | 0.000                |
| Ni-Fe           | 4.269                  | 4.158                   | -0.027               |
| C-S             | 1.748                  | 1.759                   | 0.006                |
|                 |                        |                         |                      |
| BP86            | $d_{\text{exp},6}$ [Å] | $d_{\text{calc},6}$ [Å] | $h_{\text{rel}}$ [-] |
| S-Ni            | 2.200                  | 2.209                   | 0.004                |
| S-Ni            | 2.206                  | 2.209                   | 0.001                |
| P-Ni            | 2.178                  | 2.183                   | 0.002                |
| P-Ni            | 2.178                  | 2.182                   | 0.002                |
| Ni-Fe           | 4.269                  | 4.290                   | 0.005                |
| C-S             | 1.748                  | 1.763                   | 0.008                |
|                 |                        |                         |                      |
| M06-2X          | $d_{\text{exp},6}$ [Å] | $d_{\text{calc},6}$ [Å] | $h_{\text{rel}}$ [-] |
| S-Ni            | 2.200                  | 2.277                   | 0.034                |
| S-Ni            | 2.206                  | 2.268                   | 0.027                |
| P-Ni            | 2.178                  | 2.321                   | 0.062                |
| P-Ni            | 2.178                  | 2.320                   | 0.061                |
| Ni-Fe           | 4.269                  | 4.101                   | -0.041               |
| C-S             | 1.748                  | 1.759                   | 0.006                |

| CAM-B3LYP    | $d_{\text{exp},6}$ [Å] | $d_{\text{calc},6}$ [Å] | $h_{\text{rel}}$ [-] |
|--------------|------------------------|-------------------------|----------------------|
| S-Ni         | 2.200                  | 2.208                   | 0.004                |
| S-Ni         | 2.206                  | 2.208                   | 0.001                |
| P-Ni         | 2.178                  | 2.207                   | 0.013                |
| P-Ni         | 2.178                  | 2.207                   | 0.013                |
| Ni-Fe        | 4.269                  | 4.241                   | -0.007               |
| C-S          | 1.748                  | 1.757                   | 0.005                |
|              |                        |                         |                      |
| PW91         | $d_{\text{exp},6}$ [Å] | $d_{\text{calc},6}$ [Å] | $h_{\text{rel}}$ [-] |
| S-Ni         | 2.200                  | 2.205                   | 0.002                |
| S-Ni         | 2.206                  | 2.206                   | 0.000                |
| P-Ni         | 2.178                  | 2.174                   | -0.002               |
| P-Ni         | 2.178                  | 2.175                   | -0.001               |
| Ni-Fe        | 4.269                  | 4.267                   | -0.001               |
| C-S          | 1.748                  | 1.758                   | 0.006                |
|              |                        |                         |                      |
| CAM-B3LYP-D3 | $d_{\text{exp},6}$ [Å] | $d_{\text{calc},6}$ [Å] | $h_{\text{rel}}$ [-] |
| S-Ni         | 2.200                  | 2.207                   | 0.003                |
| S-Ni         | 2.206                  | 2.222                   | 0.008                |
| P-Ni         | 2.178                  | 2.184                   | 0.003                |
| P-Ni         | 2.178                  | 2.196                   | 0.008                |
| Ni-Fe        | 4.269                  | 4.164                   | -0.025               |
| C-S          | 1.748                  | 1.753                   | 0.003                |
|              |                        |                         |                      |
| B3LYP-D3     | $d_{\text{exp},6}$ [Å] | $d_{\text{calc},6}$ [Å] | $h_{\text{rel}}$ [-] |
| S-Ni         | 2.200                  | 2.236                   | 0.016                |
| S-Ni         | 2.206                  | 2.236                   | 0.014                |
| P-Ni         | 2.178                  | 2.197                   | 0.009                |
| P-Ni         | 2.178                  | 2.197                   | 0.009                |
| Ni-Fe        | 4.269                  | 4.203                   | -0.016               |
| C-S          | 1.748                  | 1.761                   | 0.007                |

**Table S12** Comparing the relative error for  $d_{\text{Fe-M}}$  with TPSSh/def2-TZVP, and 6-311+G\*\*/LANL2DZ

| Structure | 3-21G  | def2-TZVP | 6-311+G**<br>and for metal atoms<br>LANL2DZ |
|-----------|--------|-----------|---------------------------------------------|
| 1         | 0.0350 | 0.0012    | 0.0067                                      |
| 2         | 0.0010 | 0.0187    | 0.0208                                      |
| 3         | 0.0041 | 0.0097    | 0.0134                                      |
| 4         | 0.0296 | 0.0213    | 0.0142                                      |
| 5         | 0.1159 | 0.0020    | 0.0114                                      |



**Table S14.** QTAIM derived values [a.u.] for model structures depicted in **Fig. 3.** at TPSSh/def2-TZVP+jorge-TZP

|                                                          | $q_{Fe}$<br>[-] | $q_M$<br>[-] | $d_{Fe-M}$<br>[Å] | $\rho_b$<br>[a.u.] | $\nabla^2_b$<br>[a.u.] | $H_b$<br>[a.u.] | $V_b$<br>[a.u.] |
|----------------------------------------------------------|-----------------|--------------|-------------------|--------------------|------------------------|-----------------|-----------------|
| Fc(NMe <sub>2</sub> ) <sub>2</sub> [NiCl]                | 0.695           | 0.635        | 2.621             | 0.0390             | 0.0504                 | -0.00817        | -0.0289         |
| Fc(NMe <sub>2</sub> ) <sub>2</sub> [NiNMe <sub>3</sub> ] | 0.729           | 0.722        | 2.743             | 0.0335             | 0.0316                 | -0.00620        | -0.0203         |
| Fc(NMe <sub>2</sub> ) <sub>2</sub> [NiPMe <sub>3</sub> ] | 0.709           | 0.529        | 2.723             | 0.0342             | 0.0364                 | -0.00641        | -0.0219         |
| Fc(OMe) <sub>2</sub> [NiCl]                              | 0.708           | 0.762        | 2.605             | 0.0404             | 0.0513                 | -0.00873        | -0.0303         |
| Fc(OMe) <sub>2</sub> [NiNMe <sub>3</sub> ]               | 0.677           | 0.810        | 2.643             | 0.0396             | 0.0375                 | -0.00839        | -0.0262         |
| Fc(OMe) <sub>2</sub> [NiPMe <sub>3</sub> ]               | 0.676           | 0.675        | 2.660             | 0.0381             | 0.0413                 | -0.00774        | -0.0258         |
| Fc(PMe <sub>2</sub> ) <sub>2</sub> [NiCl]                | 0.668           | 0.422        | 2.842             | 0.0256             | 0.0319                 | -0.00430        | -0.0166         |
| Fc(PMe <sub>2</sub> ) <sub>2</sub> [NiNMe <sub>3</sub> ] | 0.667           | 0.542        | 2.924             | 0.0242             | 0.0213                 | -0.00391        | -0.0132         |
| Fc(PMe <sub>2</sub> ) <sub>2</sub> [NiPMe <sub>3</sub> ] | 0.662           | 0.255        | 2.921             | 0.0239             | 0.0258                 | -0.00370        | -0.0139         |
| Fc(SMe) <sub>2</sub> [NiCl]                              | 0.715           | 0.557        | 2.802             | 0.0278             | 0.0359                 | -0.00472        | -0.0184         |
| Fc(SMe) <sub>2</sub> [NiNMe <sub>3</sub> ]               | 0.686           | 0.580        | 2.932             | 0.0241             | 0.0195                 | -0.00353        | -0.0119         |
| Fc(SMe) <sub>2</sub> [NiPMe <sub>3</sub> ]               | 0.709           | 0.422        | 2.919             | 0.0243             | 0.0243                 | -0.00349        | -0.0131         |
| Fc(NMe <sub>2</sub> ) <sub>2</sub> [PdCl]                | 0.728           | 0.586        | 2.736             | 0.0411             | 0.0386                 | -0.01027        | -0.0302         |
| Fc(NMe <sub>2</sub> ) <sub>2</sub> [PdNMe <sub>3</sub> ] | 0.726           | 0.476        | 2.756             | 0.0393             | 0.0417                 | -0.00942        | -0.0293         |
| Fc(NMe <sub>2</sub> ) <sub>2</sub> [PdPMe <sub>3</sub> ] | 0.724           | 0.666        | 2.660             | 0.0442             | 0.0601                 | -0.01101        | -0.0371         |
| Fc(OMe) <sub>2</sub> [PdCl]                              | 0.696           | 0.627        | 2.679             | 0.0449             | 0.0429                 | -0.01177        | -0.0343         |
| Fc(OMe) <sub>2</sub> [PdNMe <sub>3</sub> ]               | 0.707           | 0.538        | 2.722             | 0.0413             | 0.0456                 | -0.00995        | -0.0313         |
| Fc(OMe) <sub>2</sub> [PdPMe <sub>3</sub> ]               | 0.736           | 0.646        | 2.651             | 0.0449             | 0.0613                 | -0.01105        | -0.0374         |
| Fc(PMe <sub>2</sub> ) <sub>2</sub> [PdCl]                | 0.724           | 0.265        | 3.002             | 0.0257             | 0.0252                 | -0.00466        | -0.0156         |
| Fc(PMe <sub>2</sub> ) <sub>2</sub> [PdNMe <sub>3</sub> ] | 0.755           | 0.361        | 3.090             | 0.0244             | 0.0154                 | -0.00430        | -0.0125         |
| Fc(PMe <sub>2</sub> ) <sub>2</sub> [PdPMe <sub>3</sub> ] | 0.727           | 0.096        | 3.128             | 0.0226             | 0.0179                 | -0.00379        | -0.0121         |
| Fc(SMe) <sub>2</sub> [PdCl]                              | 0.715           | 0.495        | 2.831             | 0.0330             | 0.0392                 | -0.00661        | -0.0230         |
| Fc(SMe) <sub>2</sub> [PdNMe <sub>3</sub> ]               | 0.709           | 0.457        | 2.901             | 0.0311             | 0.0261                 | -0.00616        | -0.0188         |
| Fc(SMe) <sub>2</sub> [PdPMe <sub>3</sub> ]               | 0.693           | 0.283        | 2.952             | 0.0284             | 0.0276                 | -0.00525        | -0.0174         |

**Fig. S3** Correltaion analysis between QTAIM derived parameters in model structures depicted in **Fig. 3** (TPSSh/def2-TZVP + jorge-TZP).

|              | Pd         |          |       |            |       |       |              | Ni         |          |       |            |       |       |              |
|--------------|------------|----------|-------|------------|-------|-------|--------------|------------|----------|-------|------------|-------|-------|--------------|
| TPSSh        | $d_{Fe-M}$ | $\rho_b$ | $G_b$ | $\Delta q$ | $V_b$ | $H_b$ | $\nabla_b^2$ | $d_{Fe-M}$ | $\rho_b$ | $G_b$ | $\Delta q$ | $V_b$ | $H_b$ | $\nabla_b^2$ |
| $d_{Fe-M}$   | 1.00       |          |       |            |       |       |              | 1.00       |          |       |            |       |       |              |
| $\rho_b$     | 0.97       | 1.00     |       |            |       |       |              | 0.97       | 1.00     |       |            |       |       |              |
| $G_b$        | 0.95       | 0.96     | 1.00  |            |       |       |              | 0.97       | 0.92     | 1.00  |            |       |       |              |
| $\Delta q$   | 0.89       | 0.88     | 0.82  | 1.00       |       |       |              | 0.56       | 0.62     | 0.44  | 1.00       |       |       |              |
| $V_b$        | 0.96       | 0.98     | 0.99  | 0.84       | 1.00  |       |              | 0.98       | 0.95     | 0.99  | 0.51       | 1.00  |       |              |
| $H_b$        | 0.94       | 0.99     | 0.93  | 0.84       | 0.97  | 1.00  |              | 0.97       | 0.99     | 0.93  | 0.62       | 0.97  | 1.00  |              |
| $\nabla_b^2$ | 0.87       | 0.84     | 0.95  | 0.72       | 0.91  | 0.79  | 1.00         | 0.87       | 0.78     | 0.96  | 0.29       | 0.92  | 0.80  | 1.00         |



### Further discussion about QTAIM related parameters

A QTAIM-based approach has been proposed by Espinosa and Streubel for anionic O-donors and halides based on the corresponding VSCC minima in relation to the atomic basins of the interacting atoms in molecules.<sup>55,58</sup> Their derived dimensional relative charge concentration bands position parameter proved to be a reliable parameter to distinguish dative, and covalent bonding for the examined structures. However, it has been proposed that when at least one heavy (e.g. transitional metal) is involved in the interaction, the radial shape of the  $\nabla^2(r)$  function leaves considerable ambiguity regarding the nature of the interaction.<sup>54</sup> Therefore, the examination of other real space values at the BCP is critical.

Gibbs et al reported that for non-transitional metal-oxygen bonds, the  $G_b/\rho_b$  ratio proved to be a versatile descriptor, capable of differentiating between closed and shared shell interactions.<sup>56-57</sup> With good linear correlations with corresponding bond lengths, the  $G_b/\rho_b$  ratio was recently used by Espinosa and Streubel to differentiate weak, dative and mostly covalent bonds in phosphinidene complexes.<sup>55</sup> We have found diminished correlation between the  $G_b/\rho_b$  ratio and  $d_{Fe-M}$  for our transitional metal containing species (see Fig. S4).

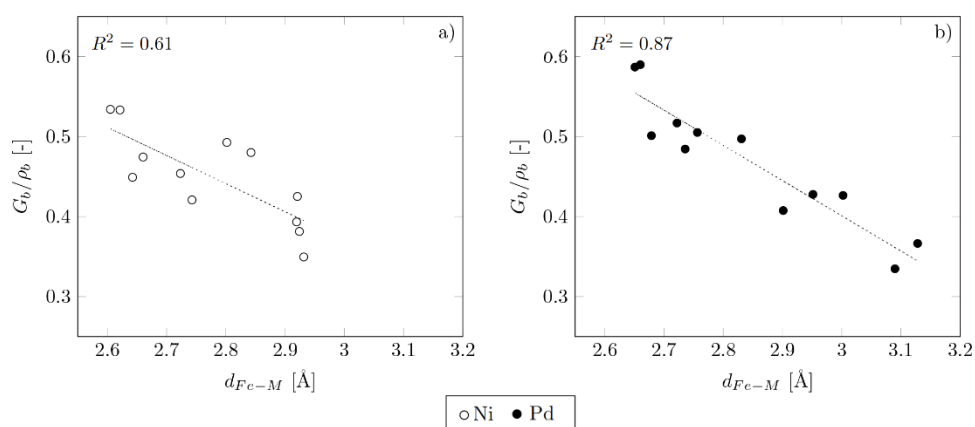

**Fig. S4** Correlation between the adimensional  $G_b/\rho_b$  ratio and  $d_{Fe-M}$  for model molecules with **a)**  $M = Pd$  and **b)**  $M = Ni$ .

### Further discussion about the involvement of the ipso-carbon atoms

The use, and physical interpretation of source function analysis derived values have been comprehensively reviewed by Gatti.<sup>53</sup> For the source function analysis in QTAIM basins, a medium quality grid (with a spacing of 0.1 Bohr) was computed corresponding to the electron density. Then, the source function - with the reference point taken as the position of the corresponding bond critical point

- was integrated into the QTAIM basins with an exact refinement of basin boundary in the Multiwfn program.

**Table S15** S% values for Ni complexes TPSSh/def2-TZVP+jorge-TZP (for metal atoms)

|                                                       | S%(Fe) | S%(Ni) | $\Sigma$ S%(C <sub>ipso</sub> ) | $\Sigma$ S%(C <sub>ipso,ortho</sub> ) |
|-------------------------------------------------------|--------|--------|---------------------------------|---------------------------------------|
| Fc(NMe <sub>2</sub> ) <sub>2</sub> NiCl               | -5.63  | 21.77  | -13.91                          |                                       |
| Fc(NMe <sub>2</sub> ) <sub>2</sub> NiNMe <sub>3</sub> | -6.37  | 14.26  | -22.15                          |                                       |
| Fc(NMe <sub>2</sub> ) <sub>2</sub> NiPMe <sub>3</sub> | -6.65  | 10.46  | -18.67                          |                                       |
| Fc(OMe) <sub>2</sub> NiCl                             | -0.08  | 9.42   | -10.91                          |                                       |
| Fc(OMe) <sub>2</sub> NiNMe <sub>3</sub>               | -4.93  | 20.82  | -12.42                          |                                       |
| Fc(OMe) <sub>2</sub> NiPMe <sub>3</sub>               | -3.40  | 15.74  | -14.07                          |                                       |
| Fc(PMe <sub>2</sub> ) <sub>2</sub> NiCl               | -20.63 | -6.61  | -11.52                          | -2.36                                 |
| Fc(PMe <sub>2</sub> ) <sub>2</sub> NiNMe <sub>3</sub> | -23.00 | 3.35   | -14.03                          | -7.48                                 |
| Fc(PMe <sub>2</sub> ) <sub>2</sub> NiPMe <sub>3</sub> | -24.48 | -0.27  | -15.91                          | -5.15                                 |
| Fc(SMe) <sub>2</sub> NiCl                             | -13.81 | -2.09  | -20.80                          | -2.32                                 |
| Fc(SMe) <sub>2</sub> NiNMe <sub>3</sub>               | -20.20 | 3.56   | -30.07                          | -3.19                                 |
| Fc(SMe) <sub>2</sub> NiPMe <sub>3</sub>               | -17.63 | -0.13  | -31.54                          | -3.56                                 |

In all complexes, a notable negative contribution to the resulting electron density can be attributed to the *ipso*-carbon atoms. As they act as sinks of electron density, they facilitate the Fe-M interaction by lowering the kinetic energy arising from the repulsion between filled orbitals of the metal fragments. Although the correlation between the corresponding S%(Fe) and S%(M) values is acceptable, a better correlation can be observed between the sum of S% values for the metal centers and the *ipso*-carbon atoms; and  $d_{\text{Fe-M}}$ , (see **Fig. S4b**). The contributions of other atoms have not been considered, as resulting complexes do not have orbitals which would correspond to an interaction ( $SF\% > -1\%$ ). In case of PMe<sub>2</sub> and SMe<sub>2</sub> donors, the effect of *ortho* carbon atoms become apparent and can no longer be neglected. (see **Fig. S4c**), yielding to a better correlation overall. This suggests that the direct heterobimetallic interaction, and the active involvement of the Cp rings dictate together the distance between metal centers in the resulting complex.

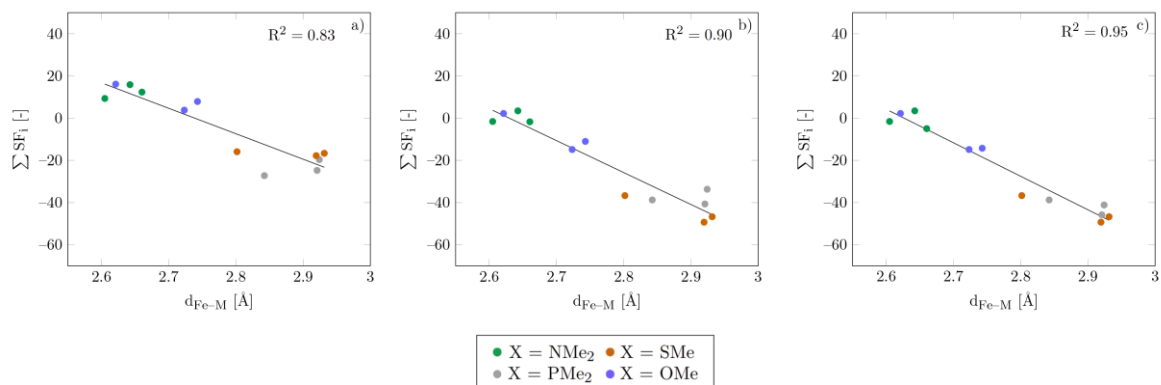

**Fig. S5** The sum of S% values for the metal atoms (a), for metal atoms and *ipso*-carbon atoms (b) and for metal atoms coupled with *ipso*, and neighboring carbon atoms (c).

It is important to highlight the error of source function computations. Although the source function is a considerably robust descriptor; as it needs to be reintegrated into the electron density grid computed in atomic basins, careful consideration should be taken in determining the trust radius, and positions of nuclear attractors. A direct measure of this is the sum of the integrated SF(A) values for all atoms, which should be close to the computed electron density in the reference point. The relative error for source function computations for Ni complexes is negligible ( $\sim 0.3\%$ , see **Table S16**) in reference to the electron density in the BCP, which validates the use of SF% in these cases. For Pd complexes however, the relative error for the computations grows significantly ( $\sim 34\%$ , see **Table S16**), which does not lessen upon the utilization of a finer integration grid. The computations were repeated with the midpoints of the metal atoms taken as reference points, and their nuclear positions instead of corresponding (3;-3) critical points yielding similar results.

**Table S16** Electron densities [a.u.] and the sum of integrated SF(A) values [a.u.] for model structures and compounds **1-5** with their corresponding relative error ( $h_{rel,\rho_b}$  [%]), at the TPSSH/def2-TZVP (jorge-TZP for metal atoms) level of theory.

|                                                          | $\rho_b$ [a.u.] | $\sum SF_i \rho_b$ [a.u.] | $h_{rel,\rho_b}$ [%] |
|----------------------------------------------------------|-----------------|---------------------------|----------------------|
| Fc(NMe <sub>2</sub> ) <sub>2</sub> [NiCl]                | 0.0389          | 0.0390                    | 0.01                 |
| Fc(NMe <sub>2</sub> ) <sub>2</sub> [NiNMe <sub>3</sub> ] | 0.0333          | 0.0335                    | 0.50                 |
| Fc(NMe <sub>2</sub> ) <sub>2</sub> [NiPMe <sub>3</sub> ] | 0.0341          | 0.0342                    | 0.25                 |
| Fc(OMe) <sub>2</sub> [NiCl]                              | 0.0402          | 0.0404                    | 0.46                 |
| Fc(OMe) <sub>2</sub> [NiNMe <sub>3</sub> ]               | 0.0394          | 0.0396                    | 0.49                 |
| Fc(OMe) <sub>2</sub> [NiPMe <sub>3</sub> ]               | 0.0380          | 0.0381                    | 0.22                 |
| Fc(PMe <sub>2</sub> ) <sub>2</sub> [NiCl]                | 0.0255          | 0.0256                    | 0.45                 |

|                                      |        |        |        |
|--------------------------------------|--------|--------|--------|
| $\text{Fc(PMe}_2)_2[\text{NiNMe}_3]$ | 0.0241 | 0.0242 | 0.52   |
| $\text{Fc(PMe}_2)_2[\text{NiPMe}_3]$ | 0.0239 | 0.0239 | 0.15   |
| $\text{Fc(SMe)}_2[\text{NiCl}]$      | 0.0277 | 0.0278 | 0.32   |
| $\text{Fc(SMe)}_2[\text{NiNMe}_3]$   | 0.0240 | 0.0241 | 0.28   |
| $\text{Fc(SMe)}_2[\text{NiPMe}_3]$   | 0.0243 | 0.0243 | 0.25   |
| $\text{Fc(NMe}_2)_2[\text{PdCl}]$    | 0.0632 | 0.0442 | -30.13 |
| $\text{Fc(NMe}_2)_2[\text{PdNMe}_3]$ | 0.0593 | 0.0411 | -30.67 |
| $\text{Fc(NMe}_2)_2[\text{PdPMe}_3]$ | 0.0575 | 0.0393 | -31.73 |
| $\text{Fc(OMe)}_2[\text{PdCl}]$      | 0.0640 | 0.0449 | -29.78 |
| $\text{Fc(OMe)}_2[\text{PdNMe}_3]$   | 0.0636 | 0.0449 | -29.36 |
| $\text{Fc(OMe)}_2[\text{PdPMe}_3]$   | 0.0598 | 0.0413 | -30.95 |
| $\text{Fc(PMe}_2)_2[\text{PdCl}]$    | 0.0427 | 0.0257 | -39.81 |
| $\text{Fc(PMe}_2)_2[\text{PdNMe}_3]$ | 0.0405 | 0.0244 | -39.85 |
| $\text{Fc(PMe}_2)_2[\text{PdPMe}_3]$ | 0.0388 | 0.0226 | -41.83 |
| $\text{Fc(SMe)}_2[\text{PdCl}]$      | 0.0508 | 0.0330 | -35.04 |
| $\text{Fc(SMe)}_2[\text{PdNMe}_3]$   | 0.0483 | 0.0311 | -35.62 |
| $\text{Fc(SMe)}_2[\text{PdPMe}_3]$   | 0.0455 | 0.0284 | -37.51 |
| 1                                    | 0.0456 | 0.0282 | -38.29 |
| 2                                    | 0.0597 | 0.0411 | -31.11 |
| 3                                    | 0.0526 | 0.0342 | -35.01 |
| 4                                    | 0.0455 | 0.0282 | -38.08 |
| 5                                    | 0.0242 | 0.0243 | 0.23   |

The involvement of the p orbitals of the *ipso*-carbon atoms can be visually represented by considering the Kohn-Sham molecular orbitals that give the largest contribution to the electron density at the bond critical point, consistent with the source function analysis.

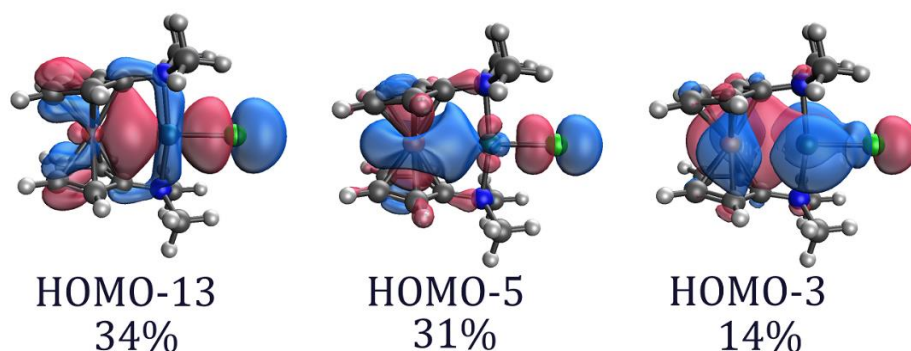

**Fig. S6.** Kohn-Sham orbitals for  $[\text{Fc}(\text{NMe}_2)\text{NiCl}]^+$  that give the largest contribution to the electron density at the bond critical point with an isosurface electron density of 0.025 a.u. (TPSSh/def2-TZVP and jorge-TZP for metal atoms)

A notable involvement of the substituent orbitals can be seen in case of  $\text{SMe}_2$  and OMe donors. However, the correlation between the resulting SF% sums to  $d_{\text{Fe-M}}$  is rather poor, suggesting that the direct effect of the substituents does not contribute to the resulting  $d_{\text{Fe-M}}$  directly (see **Fig. S5** and **Table S17**).

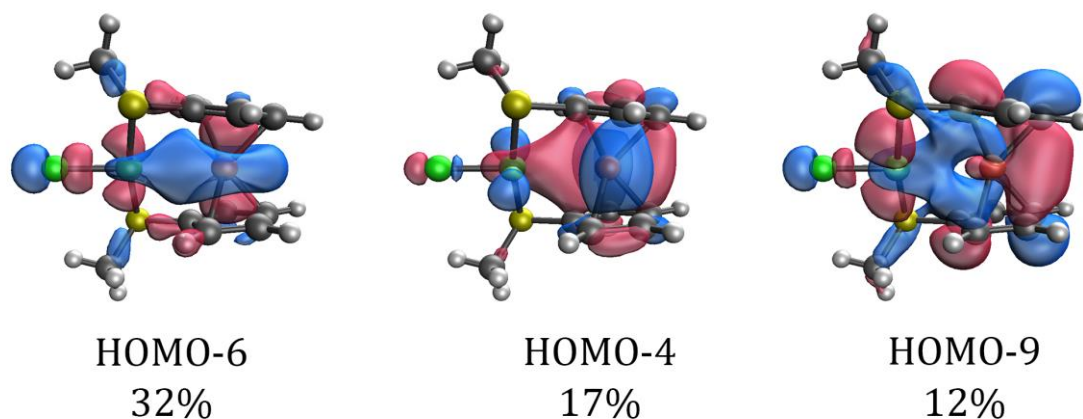

**Fig. S7.** Kohn-Sham orbitals for  $[\text{Fc}(\text{SMe})\text{NiCl}]^+$  that give the largest contribution to the electron density at the bond critical point (with an isosurface electron density of 0.025 a.u., TPSSh/def2-TZVP and jorge-TZP for metal atoms)

**Table S17** S% values for model structures. TPSSh/def2-TZVP+jorge-TZP (for metal atoms)

|                                                       | S%(Fe) | S%(Ni) | $\Sigma$ S%(D) |
|-------------------------------------------------------|--------|--------|----------------|
| Fc(NMe <sub>2</sub> ) <sub>2</sub> NiCl               | -5.63  | 21.77  | -2.00          |
| Fc(NMe <sub>2</sub> ) <sub>2</sub> NiNMe <sub>3</sub> | -6.37  | 14.26  | -0.38          |
| Fc(NMe <sub>2</sub> ) <sub>2</sub> NiPMe <sub>3</sub> | -6.65  | 10.46  | 1.63           |
| Fc(OMe) <sub>2</sub> NiCl                             | -0.08  | 9.42   | 12.66          |
| Fc(OMe) <sub>2</sub> NiNMe <sub>3</sub>               | -4.93  | 20.82  | 11.21          |
| Fc(OMe) <sub>2</sub> NiPMe <sub>3</sub>               | -3.40  | 15.74  | 12.61          |
| Fc(PMe <sub>2</sub> ) <sub>2</sub> NiCl               | -20.63 | -6.61  | 5.84           |
| Fc(PMe <sub>2</sub> ) <sub>2</sub> NiNMe <sub>3</sub> | -23.00 | 3.35   | 2.60           |
| Fc(PMe <sub>2</sub> ) <sub>2</sub> NiPMe <sub>3</sub> | -24.48 | -0.27  | 4.06           |
| Fc(SMe) <sub>2</sub> NiCl                             | -13.81 | -2.09  | 26.12          |
| Fc(SMe) <sub>2</sub> NiNMe <sub>3</sub>               | -20.20 | 3.56   | 27.51          |
| Fc(SMe) <sub>2</sub> NiPMe <sub>3</sub>               | -17.63 | -0.13  | 28.25          |

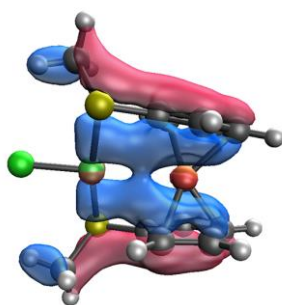

HOMO-31  
11%

**Fig. S8.** Kohn-Sham orbital HOMO-31 for [Fc(SMe)NiCl]<sup>+</sup> that give the largest contribution to the electron density at the bond critical point (with an isosurface electron density of 0.040 a.u., TPSSh/def2-TZVP and jorge-TZP for metal atoms)

**Table S18** Comparison of the DFT results with LNO-CCSD(T)/def2-QZVP//TPSSh/def2-TZVP level of theory (for  $\text{Fc}(\text{NMe}_2)_2$  based systems)

| level of theory                         | $\Delta E$ [kcal/mol] |       |                       |                       |                       |                       |
|-----------------------------------------|-----------------------|-------|-----------------------|-----------------------|-----------------------|-----------------------|
|                                         | PdCl                  | NiCl  | Pd(PMe <sub>3</sub> ) | Ni(PMe <sub>3</sub> ) | Pd(NMe <sub>3</sub> ) | Ni(NMe <sub>3</sub> ) |
| TPSSh/def2-TZVP                         | -10.1                 | -11.1 | -24.1                 | -25.4                 | -32.2                 | -28.7                 |
| LNO-CCSD(T)/def2-QZVP// TPSSh/def2-TZVP | -10.8                 | -*    | -24.8                 | -*                    | -36.0                 | -24.4                 |

**Table S19** Comparison of the DFT results with LNO-CCSD(T)/def2-QZVP//TPSSh/def2-TZVP level of theory (for  $\text{Fc}(\text{NMe}_2)_2$  based systems)

| level of theory                         | $\Delta E$ [kcal/mol] |       |                       |                       |                       |                       |
|-----------------------------------------|-----------------------|-------|-----------------------|-----------------------|-----------------------|-----------------------|
|                                         | PdCl                  | NiCl  | Pd(PMe <sub>3</sub> ) | Ni(PMe <sub>3</sub> ) | Pd(NMe <sub>3</sub> ) | Ni(NMe <sub>3</sub> ) |
| TPSSh/def2-TZVP                         | -25.7                 | -27.9 | -34.3                 | -33.5                 | -42.2                 | -34.6                 |
| LNO-CCSD(T)/def2-QZVP// TPSSh/def2-TZVP | -36.1                 | -29.0 | -37.9                 | -33.3                 | -48.8                 | -33.6                 |

\* LNO-CCSD(T) failed to reach convergence

**Table S20** Comparison of different DFT functionals (for  $\text{Fc}(\text{NMe}_2)_2$  based system)
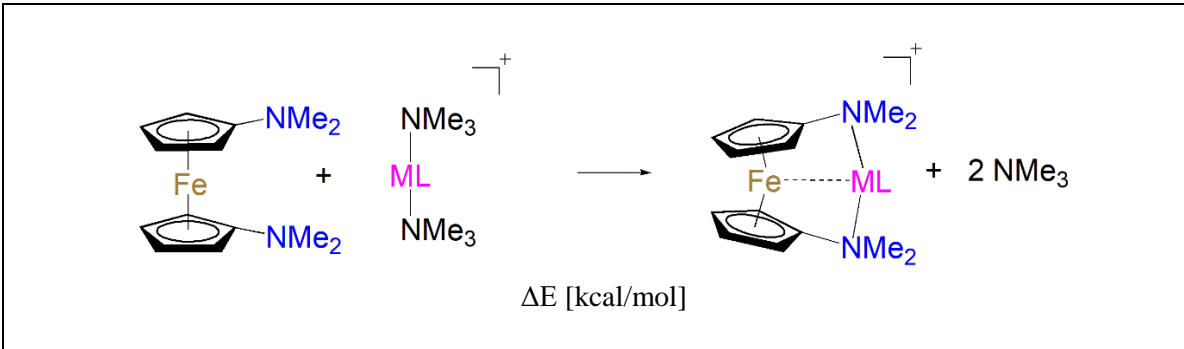

| ML   | TPSSH/def2-TZVP | LNO-CCSD(T)/def2-QZVP//TPSSH/def2-TZVP | $\omega$ B97X-D/def2-TZVP | M06-2X/def2-TZVP | B3LYP/def2-TZVP | CAM-B3LYP/def2-TZVP | B3LYP-D3/def2-TZVP | BP86/def2-TZVP |
|------|-----------------|----------------------------------------|---------------------------|------------------|-----------------|---------------------|--------------------|----------------|
| NiCl | -27.9           | -29.0                                  | -18.7                     | -10.3            | -21.2           | -16.3               | -19.6              | -28.6          |

**Table S21** Comparison of different DFT functionals (for  $\text{Fc}(\text{PMe}_2)_2$  based system)
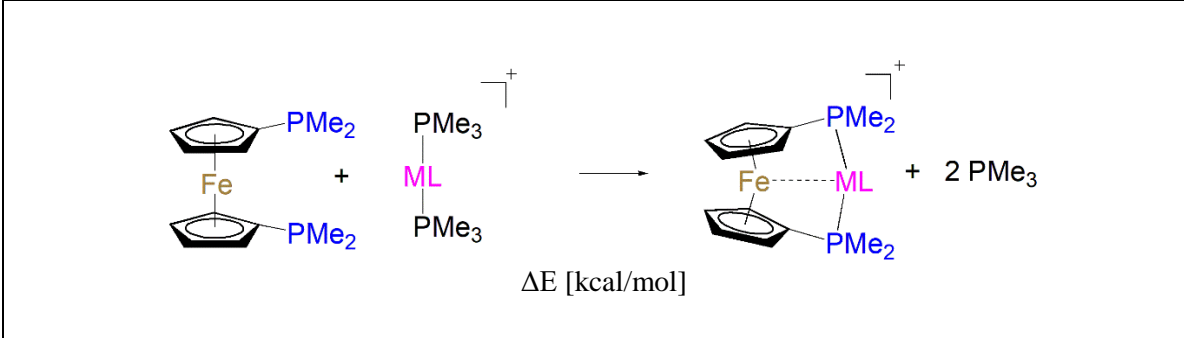

| ML       | TPSSH/def2-TZVP | LNO-CCSD(T)/def2-QZVP//TPSSH/def2-TZVP | $\omega$ B97X-D/def2-TZVP | M06-2X/def2-TZVP | B3LYP/def2-TZVP | CAM-B3LYP/def2-TZVP | B3LYP-D3/def2-TZVP | BP86/def2-TZVP |
|----------|-----------------|----------------------------------------|---------------------------|------------------|-----------------|---------------------|--------------------|----------------|
| PdCl     | -10.1           | -10.8                                  | -1.2                      | 3.2              | -6.5            | 7.4                 | -2.9               | -12.7          |
| PdPMe3   | -24.1           | -24.8                                  | -15.8                     | -10.7            | -20.8           | -18.8               | -17.9              | -25.3          |
| Ni(PMe3) | -25.4           | -                                      | -16.9                     | -10.9            | -21.8           | -6.0                | -18.8              | -27.3          |



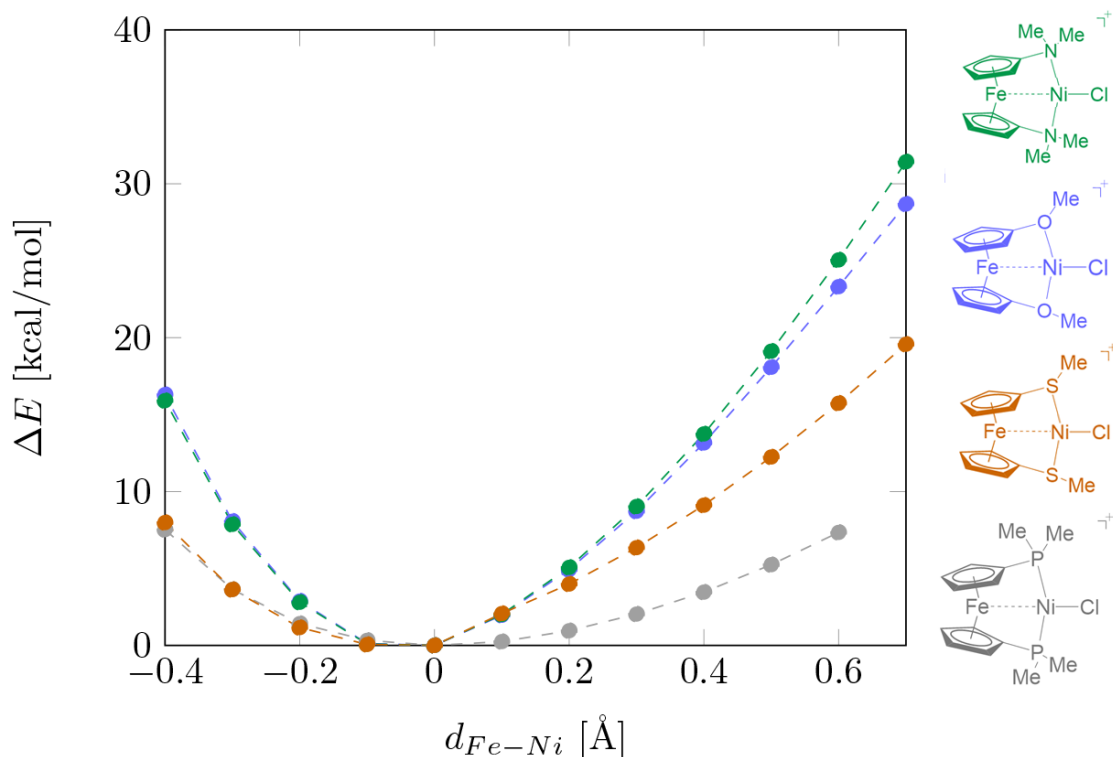

**Fig. S9** PES scans for  $\text{Fc}(\text{OMe})_2[\text{NiCl}]^+$ ,  $\text{Fc}(\text{NMe}_2)_2[\text{NiCl}]^+$ ,  $\text{Fc}(\text{SMe})_2[\text{NiCl}]^+$   $\text{Fc}(\text{PMe}_2)_2[\text{NiCl}]^+$  (at TPSSh/def2-SVP level of theory)

**Table S22** Energy difference between scan point 1 and 7 (for single point calculations the geometry obtained after the scan calculations at TPSSh/def2-SVP were used, the Fe-Pd bond was elongated by 0.7 Å). Utilization of DKH Hamiltonians is indicated as DKH0 or DKH2.

|                                                    | $\Delta E$ [kcal/mol]                    |                                        |                                        |                                          |
|----------------------------------------------------|------------------------------------------|----------------------------------------|----------------------------------------|------------------------------------------|
|                                                    | $\text{Fc}(\text{NMe}_2)_2[\text{PdCl}]$ | $\text{Fc}(\text{OMe})_2[\text{PdCl}]$ | $\text{Fc}(\text{SMe})_2[\text{PdCl}]$ | $\text{Fc}(\text{PMe}_2)_2[\text{PdCl}]$ |
| def2-TZVP                                          | 37.3                                     | 31.5                                   | 23.0                                   | 21.0                                     |
| <b>jorge-TZP</b>                                   | 42.3                                     | 37.1                                   | 28.7                                   | 25.2                                     |
| jorge-TZP<br>DKH0                                  | 46.2                                     | 43.1                                   | 31.1                                   | 26.4                                     |
| jorge-TZP<br>DKH2                                  | 46.1                                     | 42.8                                   | 31.1                                   | 26.4                                     |
| jorge-TZP-DKH                                      | 40.6                                     | 34.1                                   | 26.3                                   | 23.7                                     |
| <b>jorge-TZP-<br/>DKH DKH0</b>                     | 43.8                                     | 39.5                                   | 27.7                                   | 24.2                                     |
| <b>jorge-TZP-<br/>DKH DKH2</b>                     | 43.7                                     | 39.1                                   | 27.7                                   | 24.2                                     |
| LNO-CCSD(T)/<br>def2-QZVP//<br>TPSSh/def2-<br>TZVP | 43.3                                     | 40.8                                   | 29.1                                   | 26.8                                     |

**Table S23** Computed BSSE [kcal/mol] for model structures with L = Cl.

| BSSE [kcal/mol]                                                             |     |
|-----------------------------------------------------------------------------|-----|
| for system Fc(NMe <sub>2</sub> ) <sub>2</sub> [PdCl]/ Pd(NMe <sub>3</sub> ) | 0.1 |
| for system Fc(PMe <sub>2</sub> ) <sub>2</sub> [PdCl]/Pd(PMe <sub>3</sub> )  | 0.4 |
| for system Fc(NMe <sub>2</sub> ) <sub>2</sub> [NiCl]/ Ni(NMe <sub>3</sub> ) | 0.2 |
| for system Fc(PMe <sub>2</sub> ) <sub>2</sub> [NiCl]/ Ni(PMe <sub>3</sub> ) | 0.4 |

**Table S24** Computed adiabatic local mode force constants for the corresponding Fe-M bond [mDyn/Å]

|                                                          | $k_a$ [mDyn/Å] |
|----------------------------------------------------------|----------------|
| Fc(NMe <sub>2</sub> ) <sub>2</sub> [NiCl]                | 1.080          |
| Fc(NMe <sub>2</sub> ) <sub>2</sub> [NiNMe <sub>3</sub> ] | 0.808          |
| Fc(NMe <sub>2</sub> ) <sub>2</sub> [NiPMe <sub>3</sub> ] | 0.862          |
| Fc(OMe) <sub>2</sub> [NiCl]                              | 1.076          |
| Fc(OMe) <sub>2</sub> [NiNMe <sub>3</sub> ]               | 0.828          |
| Fc(OMe) <sub>2</sub> [NiPMe <sub>3</sub> ]               | 0.858          |
| Fc(PMe <sub>2</sub> ) <sub>2</sub> [NiCl]                | 0.313          |
| Fc(PMe <sub>2</sub> ) <sub>2</sub> [NiNMe <sub>3</sub> ] | 0.259          |
| Fc(PMe <sub>2</sub> ) <sub>2</sub> [NiPMe <sub>3</sub> ] | 0.236          |
| Fc(SMe) <sub>2</sub> [NiCl]                              | 0.591          |
| Fc(SMe) <sub>2</sub> [NiNMe <sub>3</sub> ]               | 0.450          |
| Fc(SMe) <sub>2</sub> [NiPMe <sub>3</sub> ]               | 0.496          |
| Fc(NMe <sub>2</sub> ) <sub>2</sub> [PdCl]                | 1.415          |
| Fc(NMe <sub>2</sub> ) <sub>2</sub> [PdNMe <sub>3</sub> ] | 1.137          |
| Fc(NMe <sub>2</sub> ) <sub>2</sub> [PdPMe <sub>3</sub> ] | 1.096          |
| Fc(OMe) <sub>2</sub> [PdCl]                              | 1.306          |
| Fc(OMe) <sub>2</sub> [PdNMe <sub>3</sub> ]               | 1.101          |
| Fc(OMe) <sub>2</sub> [PdPMe <sub>3</sub> ]               | 1.012          |
| Fc(PMe <sub>2</sub> ) <sub>2</sub> [PdCl]                | 0.626          |
| Fc(PMe <sub>2</sub> ) <sub>2</sub> [PdNMe <sub>3</sub> ] | 0.551          |
| Fc(PMe <sub>2</sub> ) <sub>2</sub> [PdPMe <sub>3</sub> ] | 0.54           |
| Fc(SMe) <sub>2</sub> [PdCl]                              | 0.779          |
| Fc(SMe) <sub>2</sub> [PdNMe <sub>3</sub> ]               | 0.637          |
| Fc(SMe) <sub>2</sub> [PdPMe <sub>3</sub> ]               | 0.622          |
